# Supplementary material for: Ultrasonic-induced synthesis of novel diverse arylidenes via Knoevenagel condensation reaction. Antitumor, QSAR, docking and DFT assessment
Source: Royal Society of Chemistry journal article supplement (doi:10.1039/d3ra05799b), 2023-01-01

***Spectroscopic data***

---

**Ultrasonic-Induced Synthesis of Novel Diverse Arylidenes Via Knoevenagel Condensation Reaction. Antitumor, QSAR, Docking and DFT Assessment**

Eman El-Sayed Ebead<sup>a</sup>, Asmaa Aboelnaga<sup>a</sup>, Ekhlass Nassar<sup>a</sup> Mohamed M. Naguib<sup>b</sup>

and Mahmoud F. Ismail<sup>c,\*</sup>

*\*E-mail: fawzy2010@sci.asu.edu.eg*

<sup>a</sup> Chemistry Department, Faculty of Women for Arts, Science and Education, Ain Shams University, Heliopolis, Egypt.

<sup>b</sup> Department of Biochemistry, Faculty of Science, Ain Shams University, 11566, Abbassia, Cairo, Egypt

<sup>c</sup> Department of Chemistry, Faculty of Science, Ain Shams University, 11566, Abbassia, Cairo, Egypt

**Fax: +(202) 24831836; phone: +(202) 24831836.**

**\*Corresponding author; e-mail: [fawzy2010@sci.asu.edu.eg](mailto:fawzy2010@sci.asu.edu.eg)**

**Full spectroscopic data.**

## Spectroscopic data

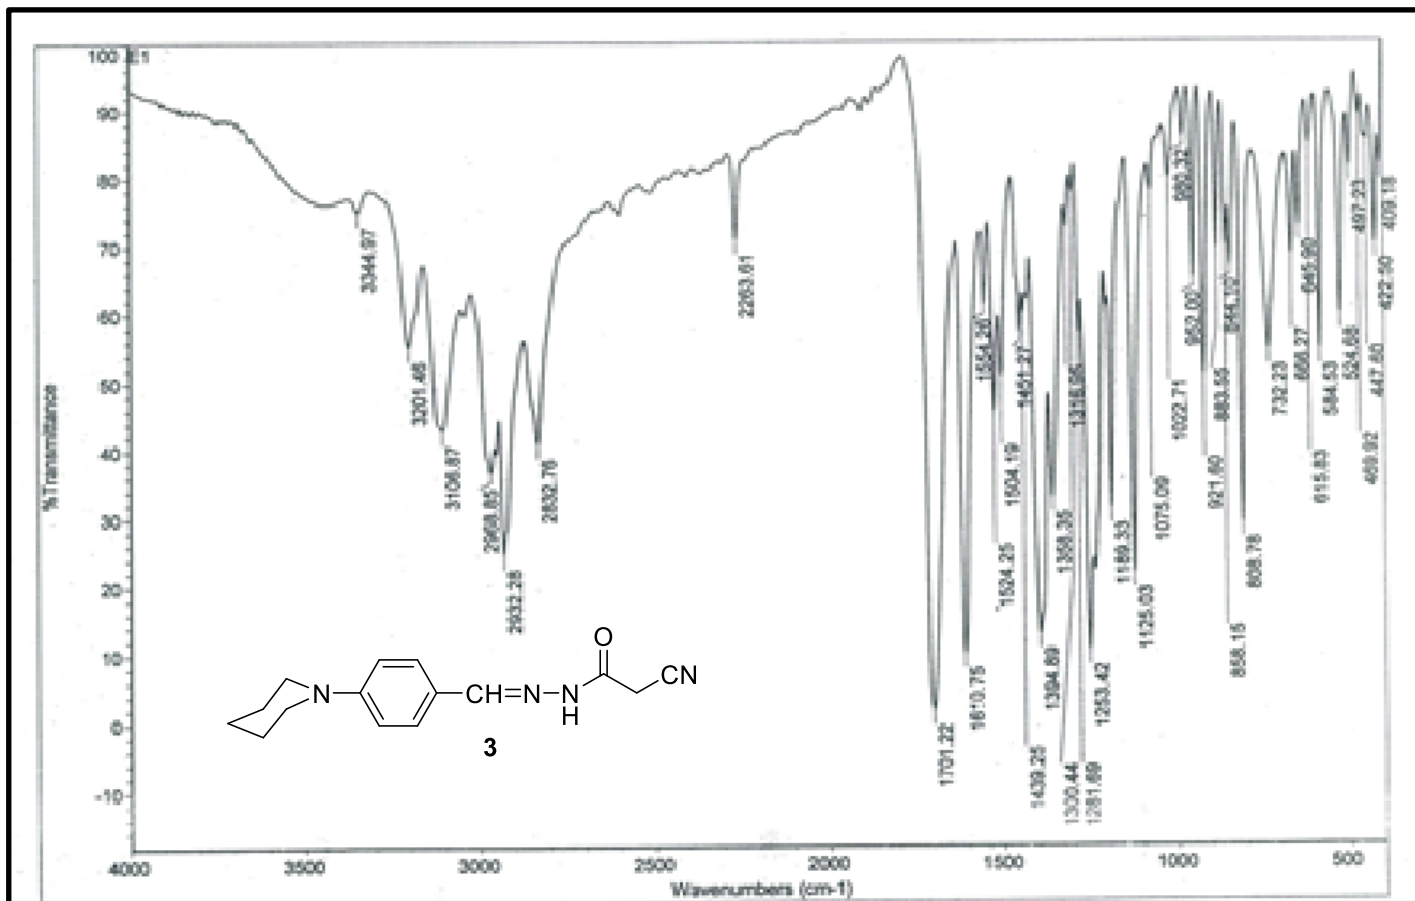

# Spectroscopic data

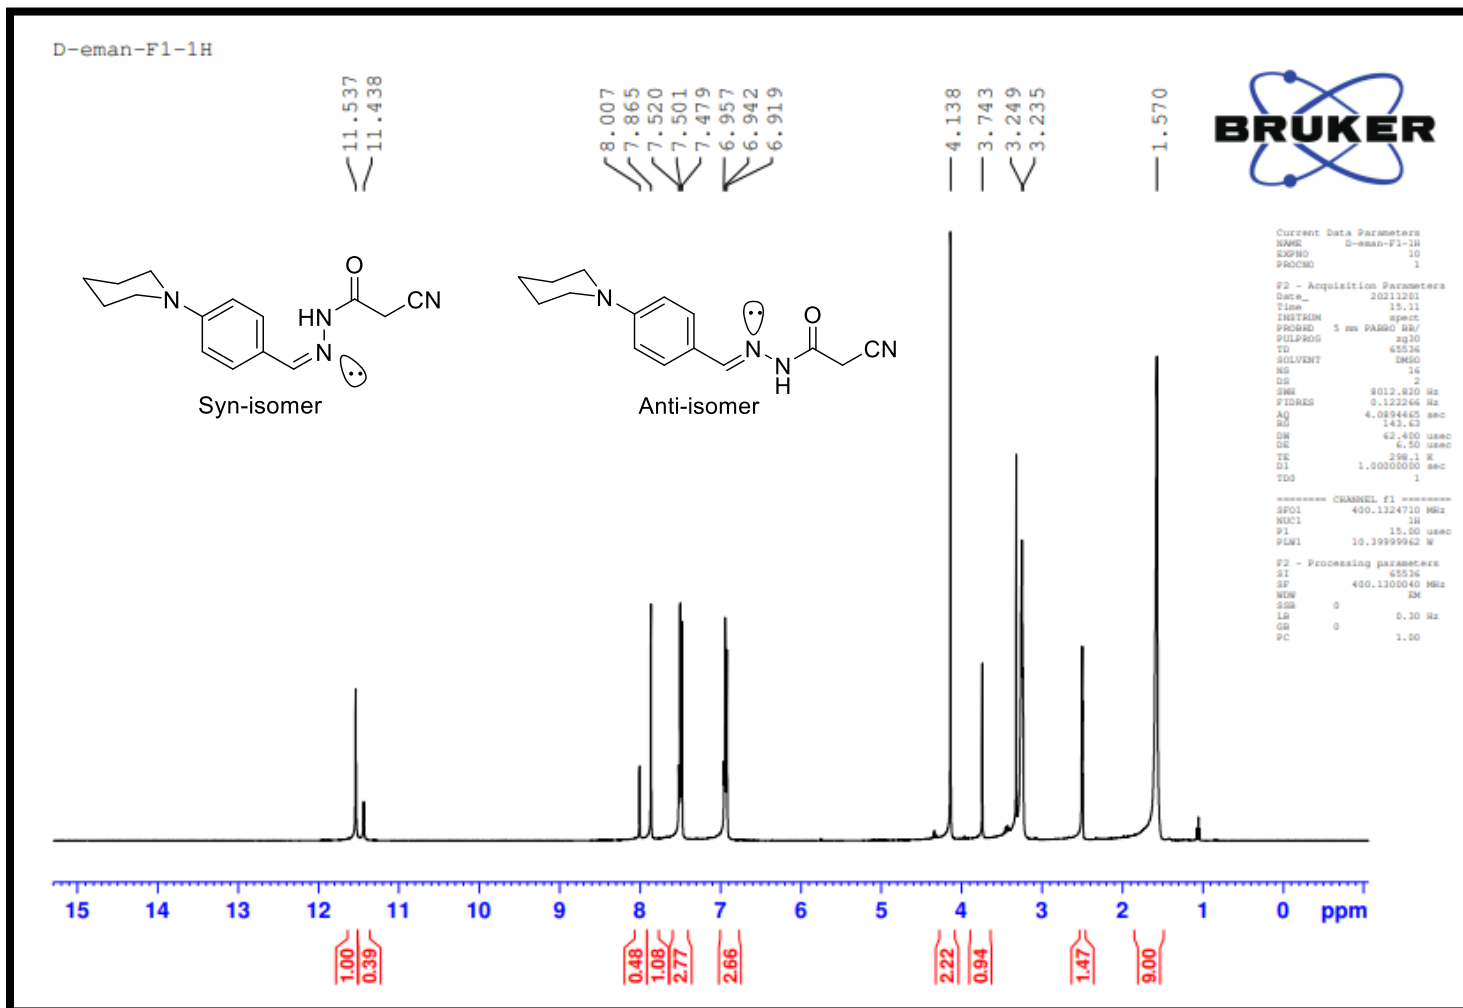

# Spectroscopic data

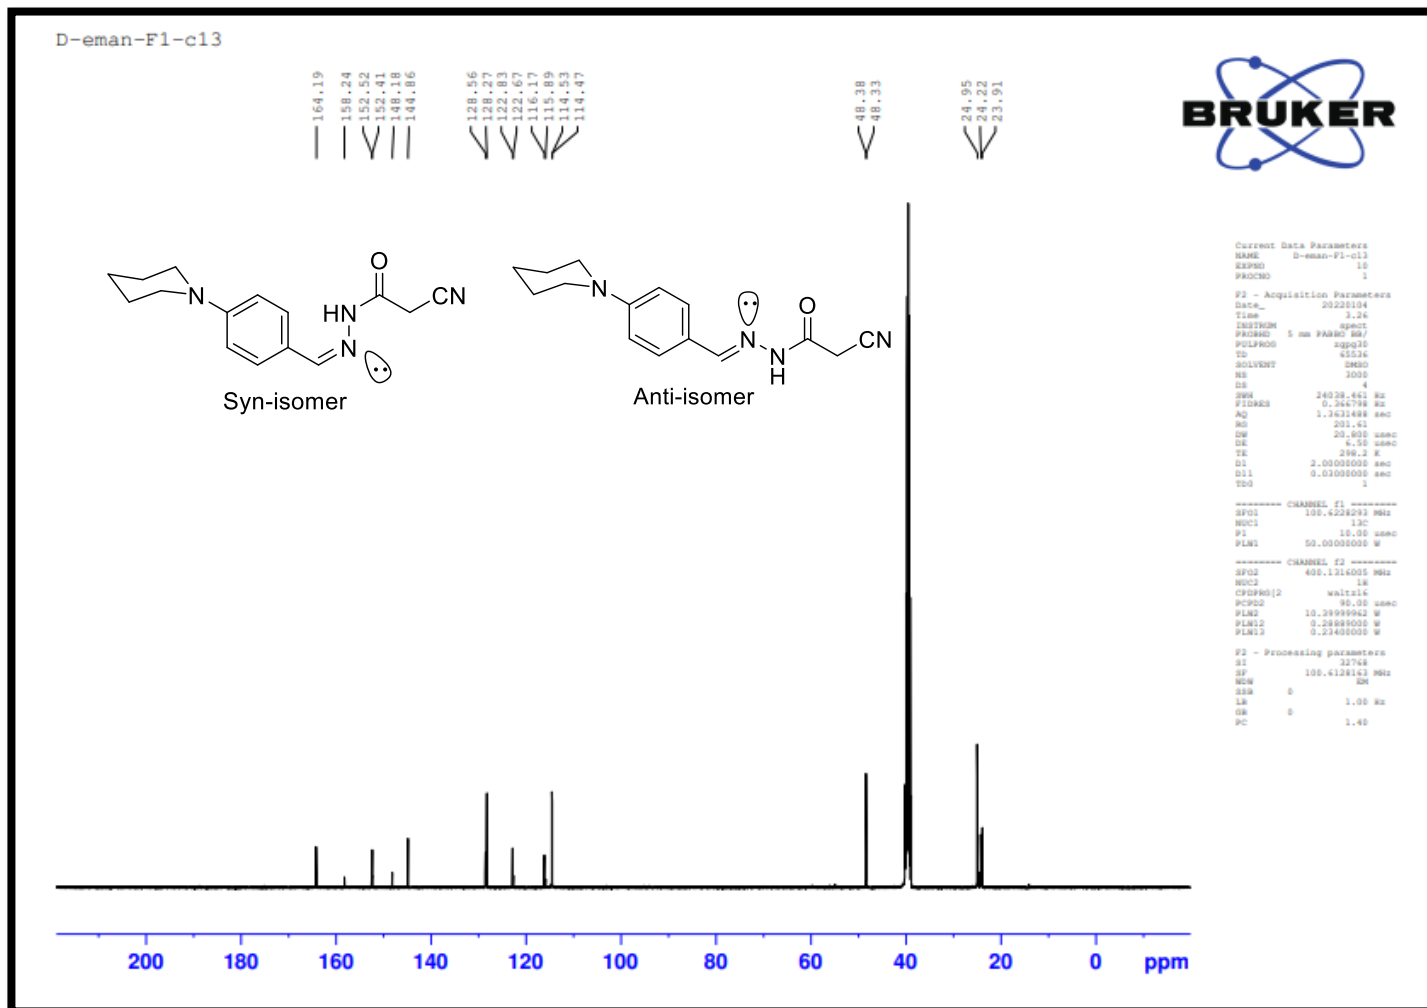

# Spectroscopic data

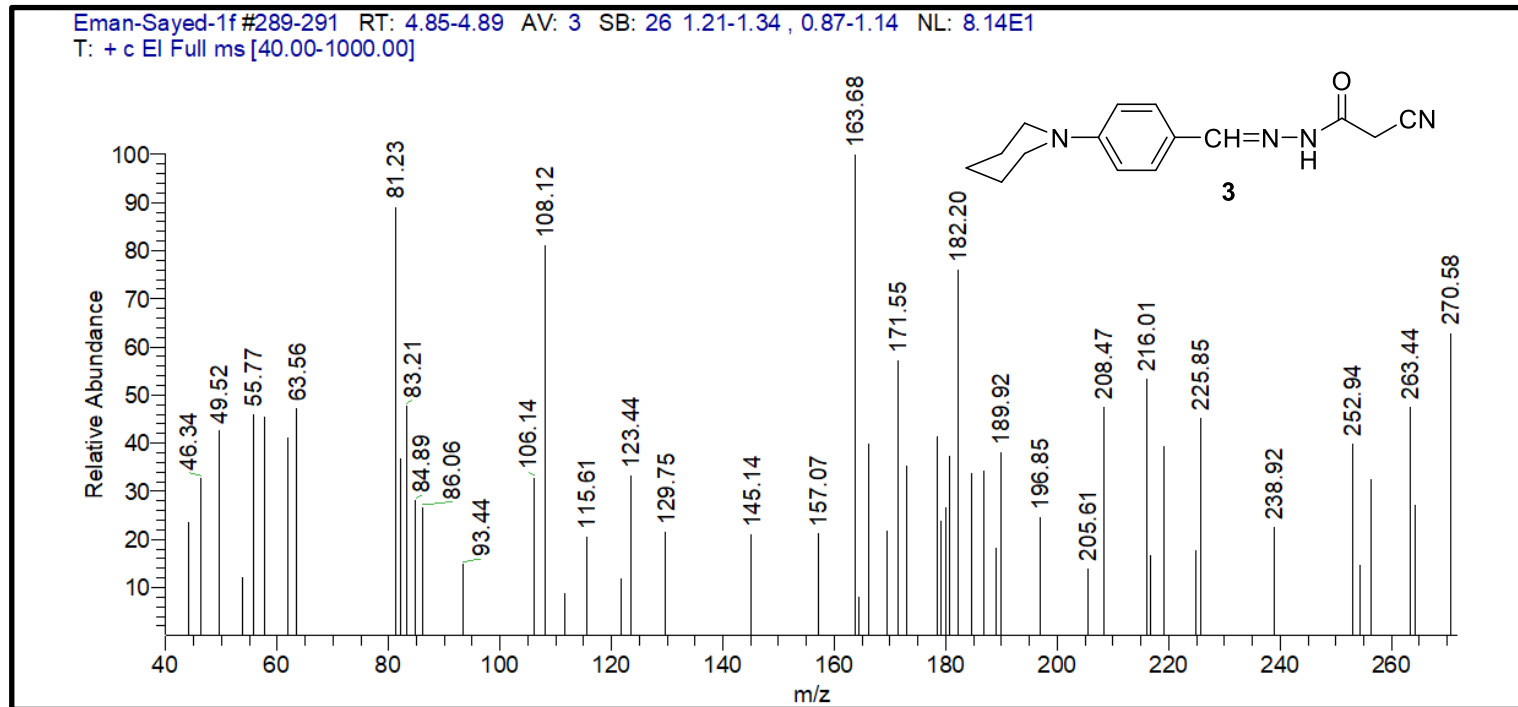

## Spectroscopic data

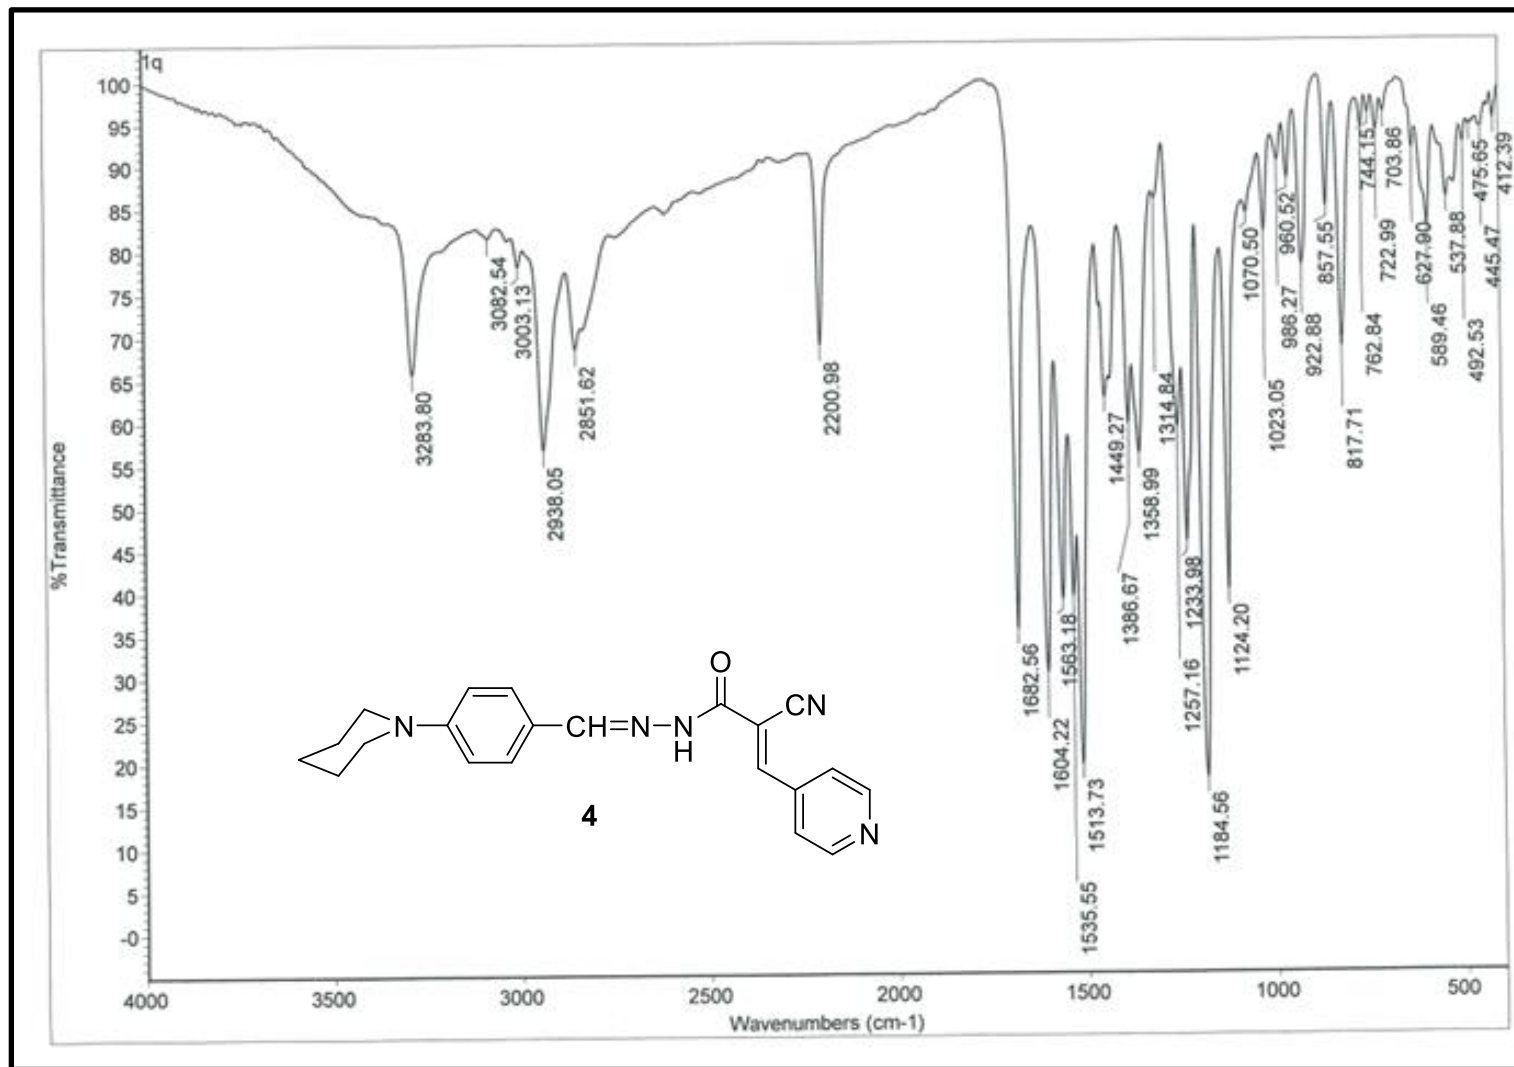

# Spectroscopic data

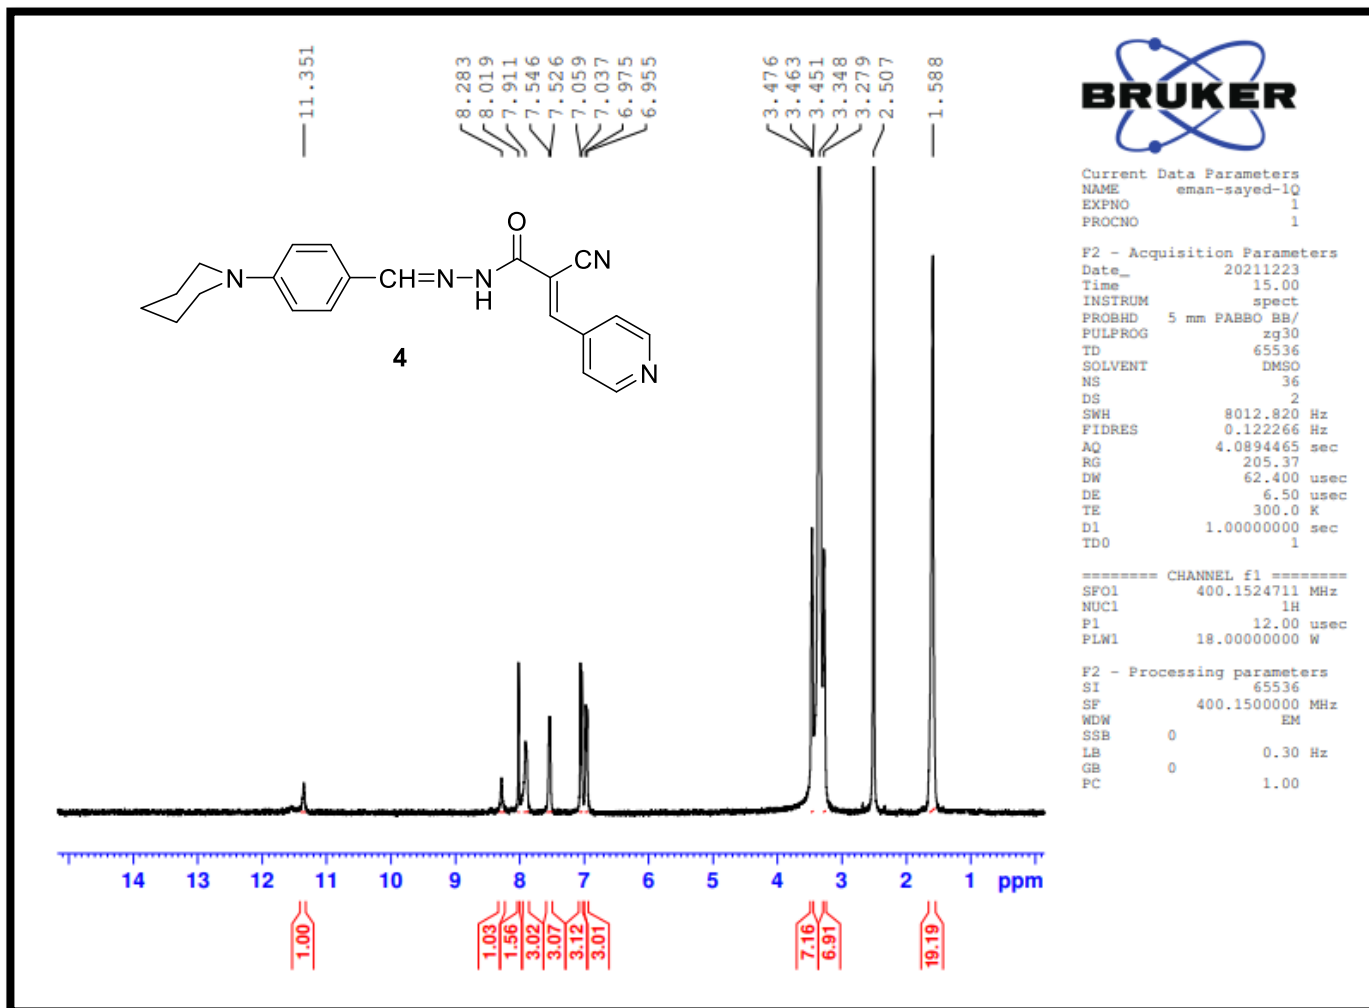

# Spectroscopic data

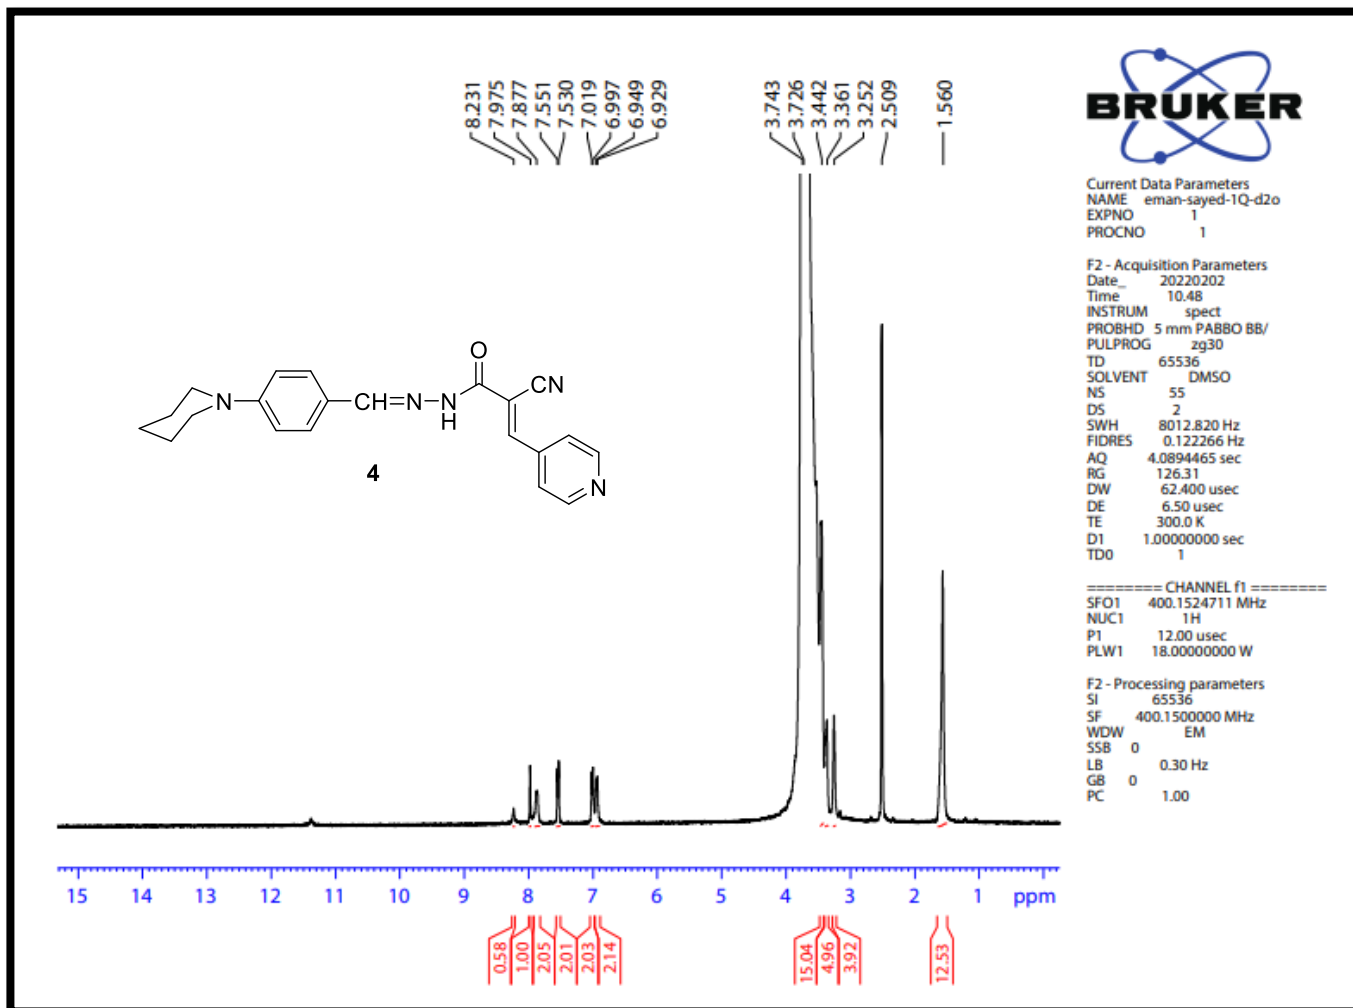



# Spectroscopic data

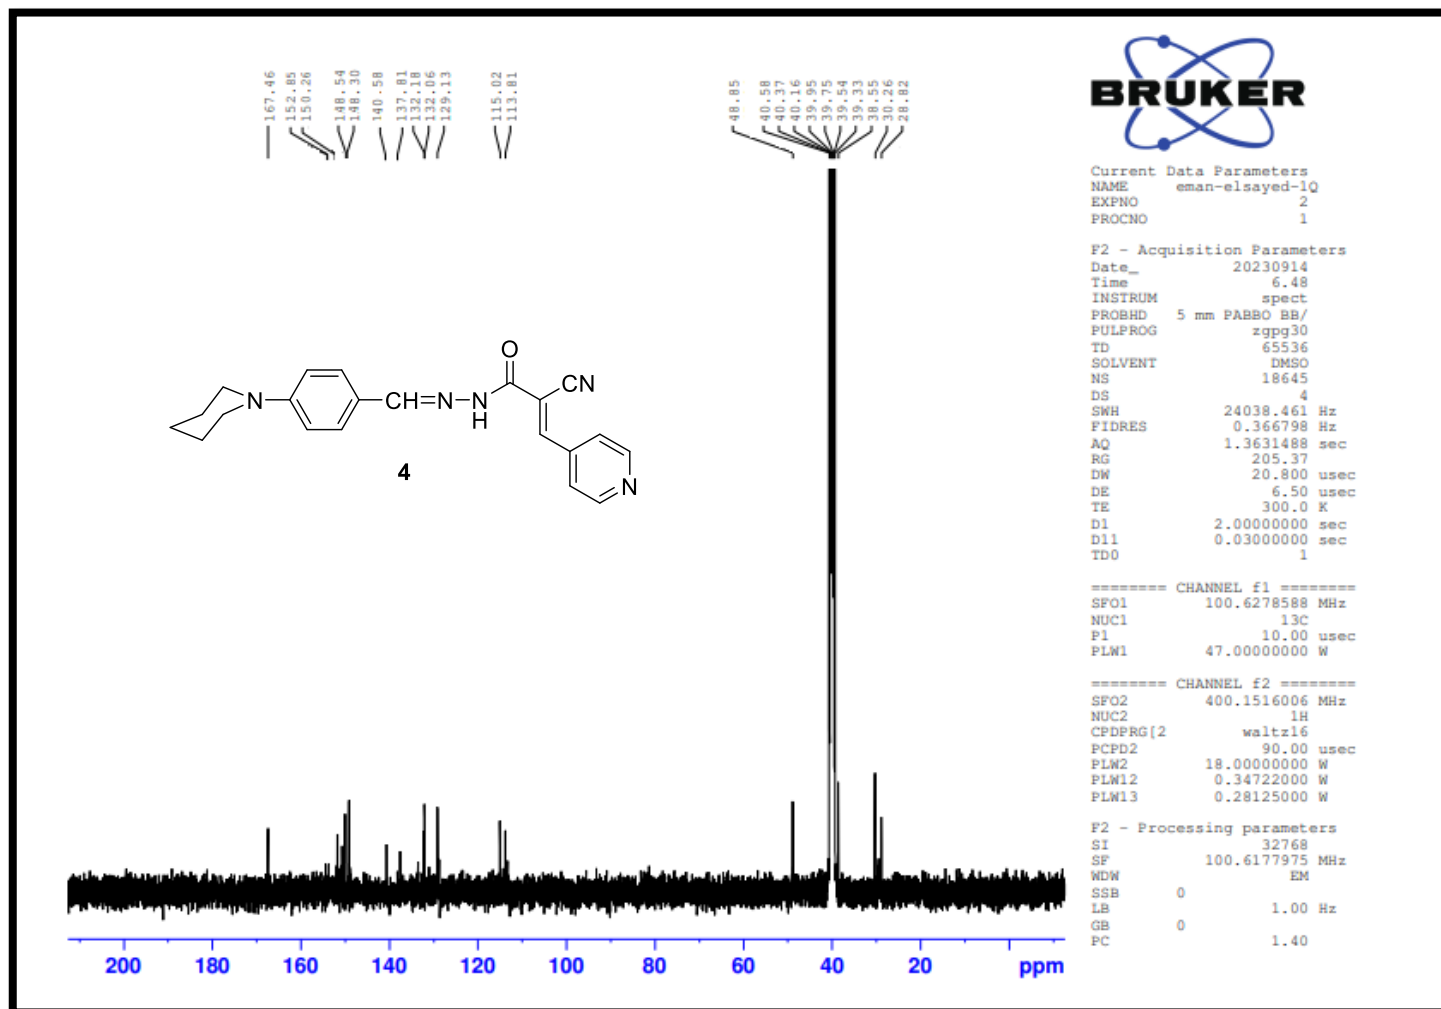

# Spectroscopic data

eman-elsayed-1q #110-112 RT: 1.86-1.89 AV: 3 SB: 26 1.21-1.34, 0.87-1.14 NL: 1.10E2  
T: + c EI Full ms [40.00-1000.00]

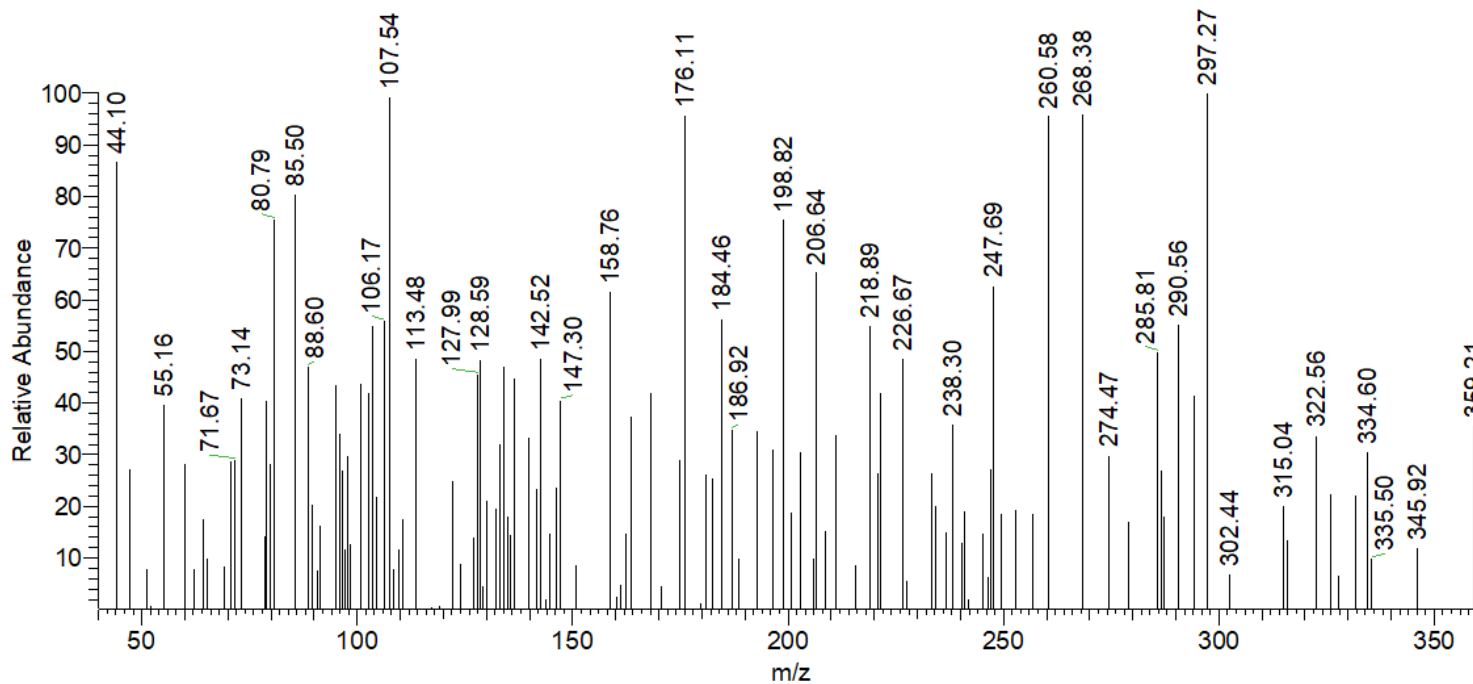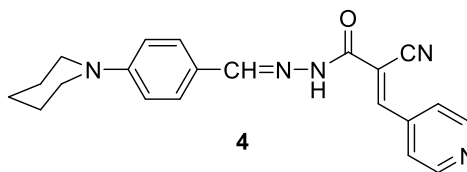

4

10

## Spectroscopic data

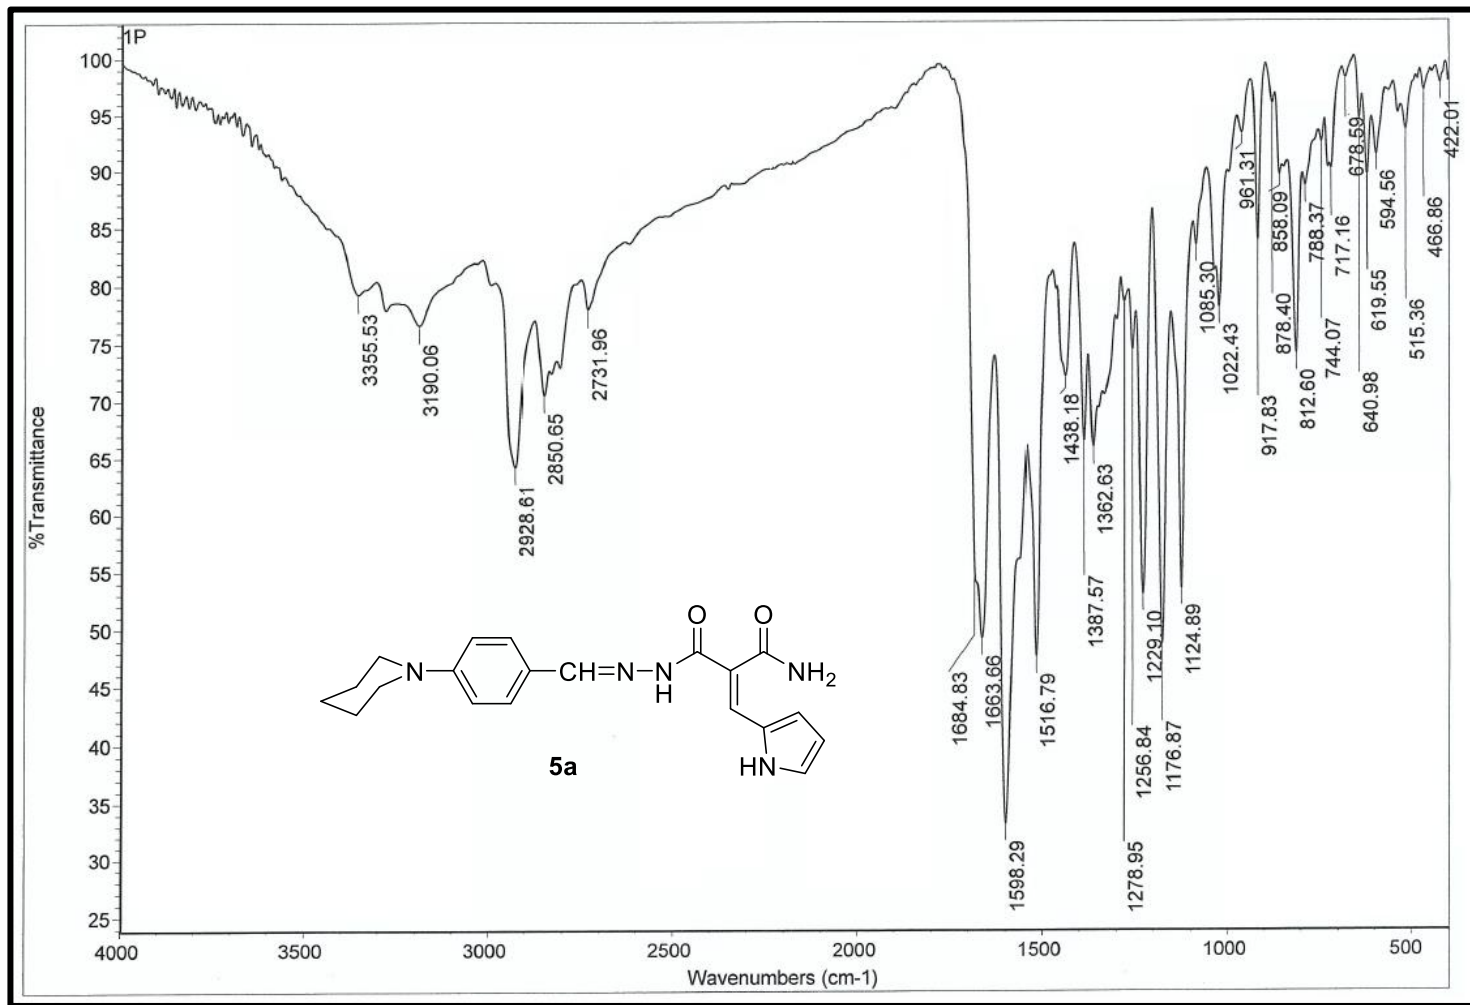

# Spectroscopic data

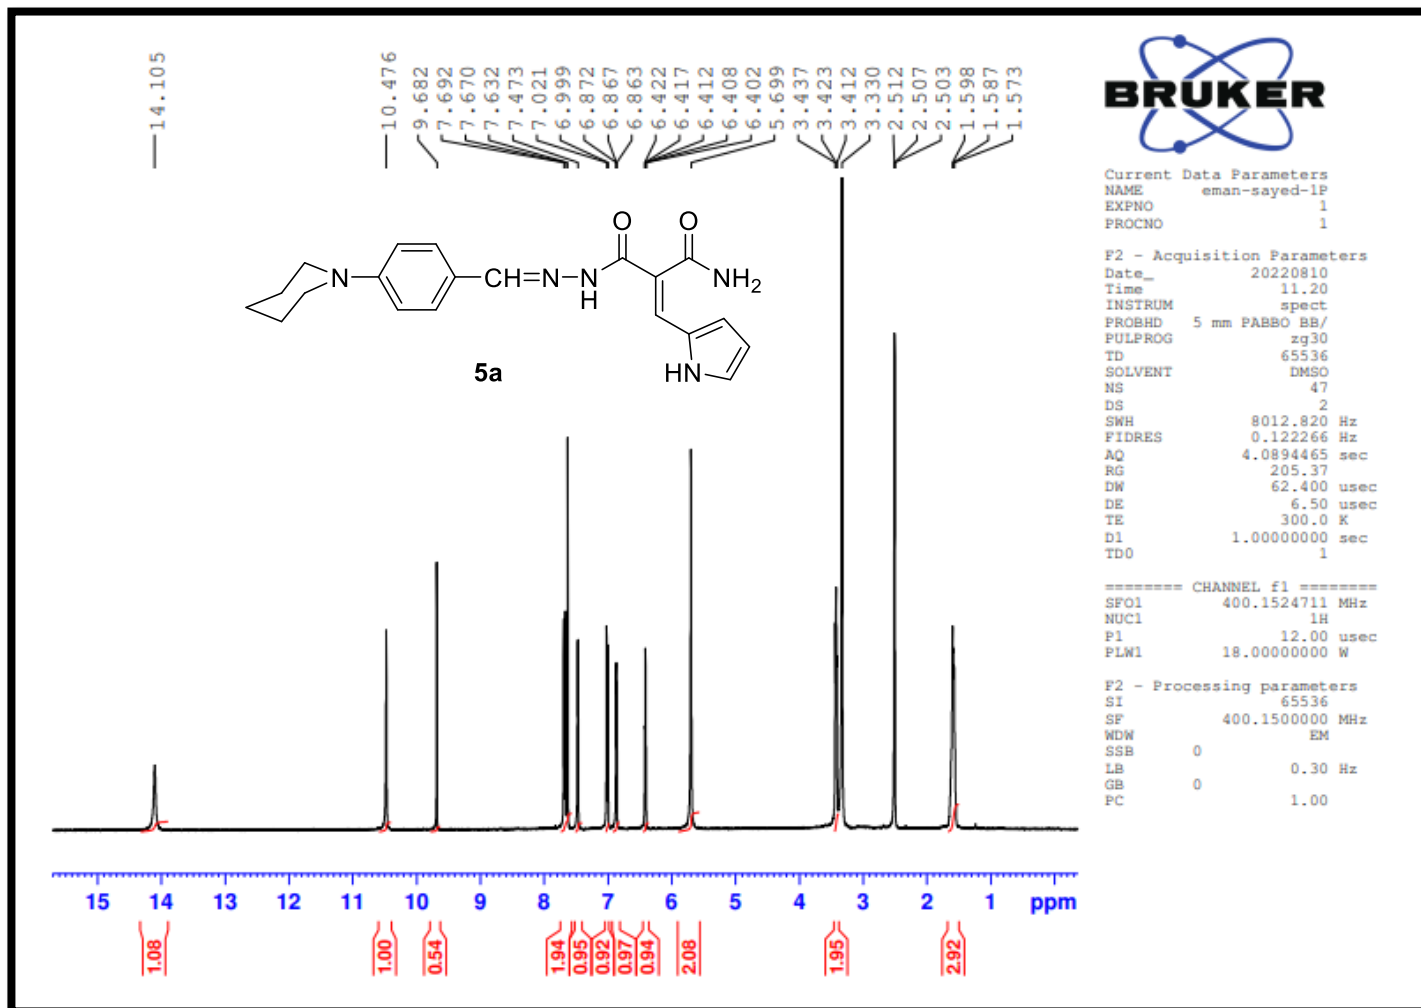

# Spectroscopic data

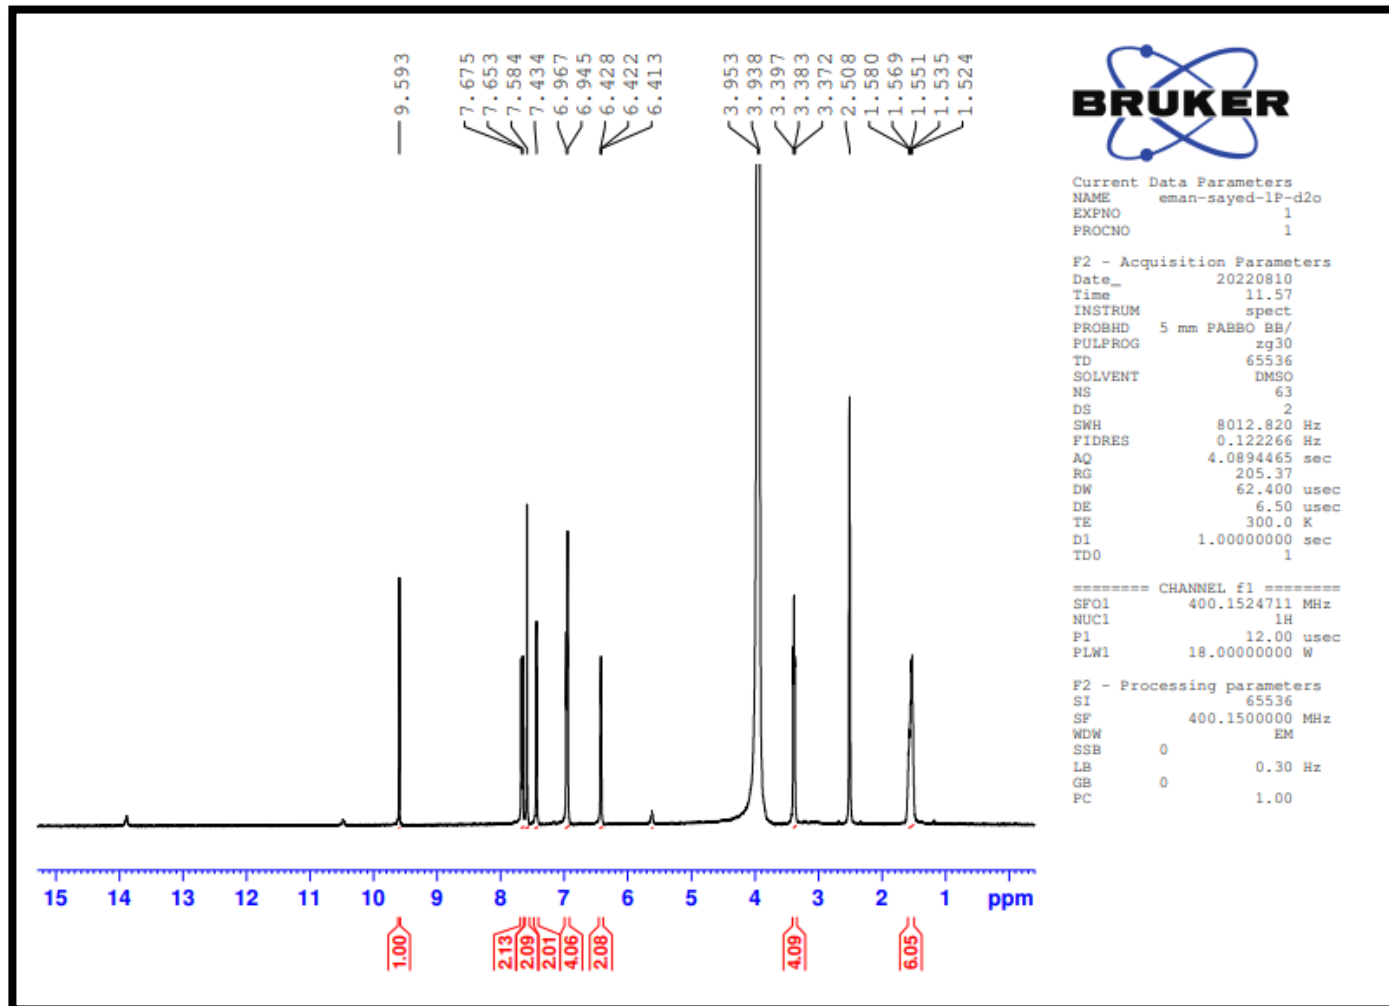

# Spectroscopic data

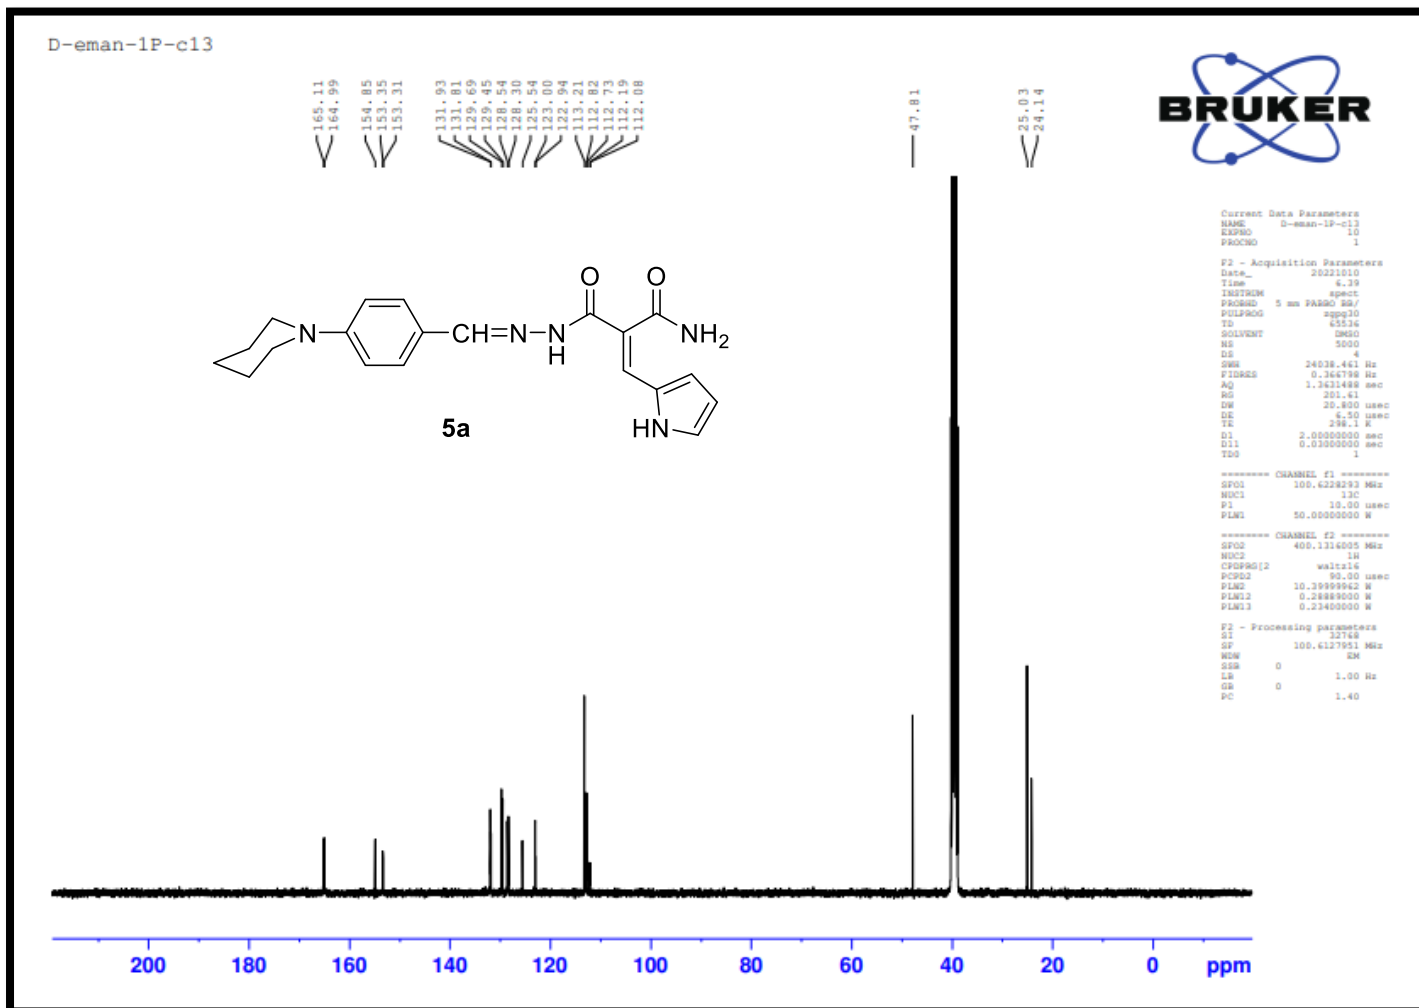

# Spectroscopic data

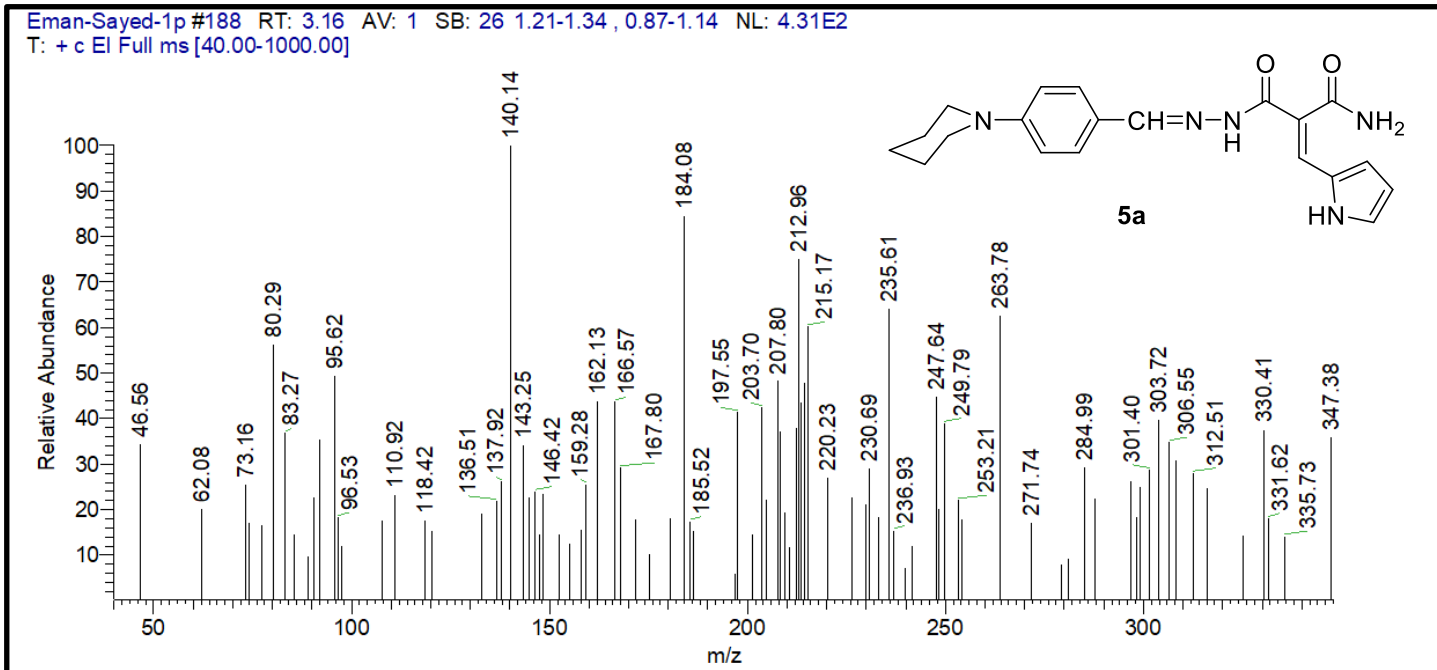

## Spectroscopic data

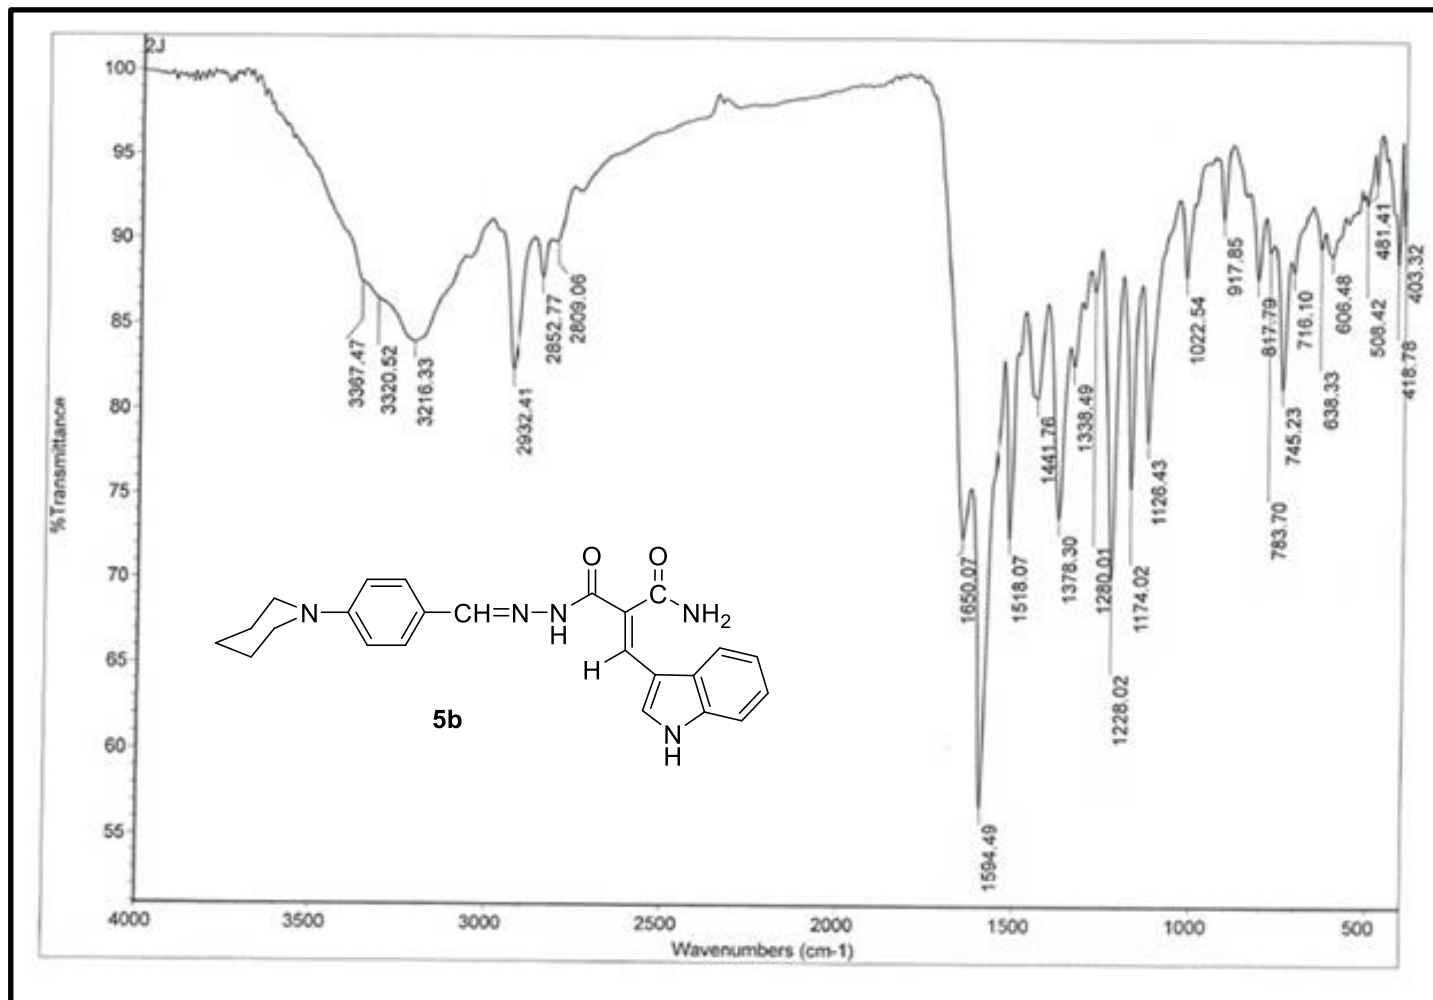



# Spectroscopic data

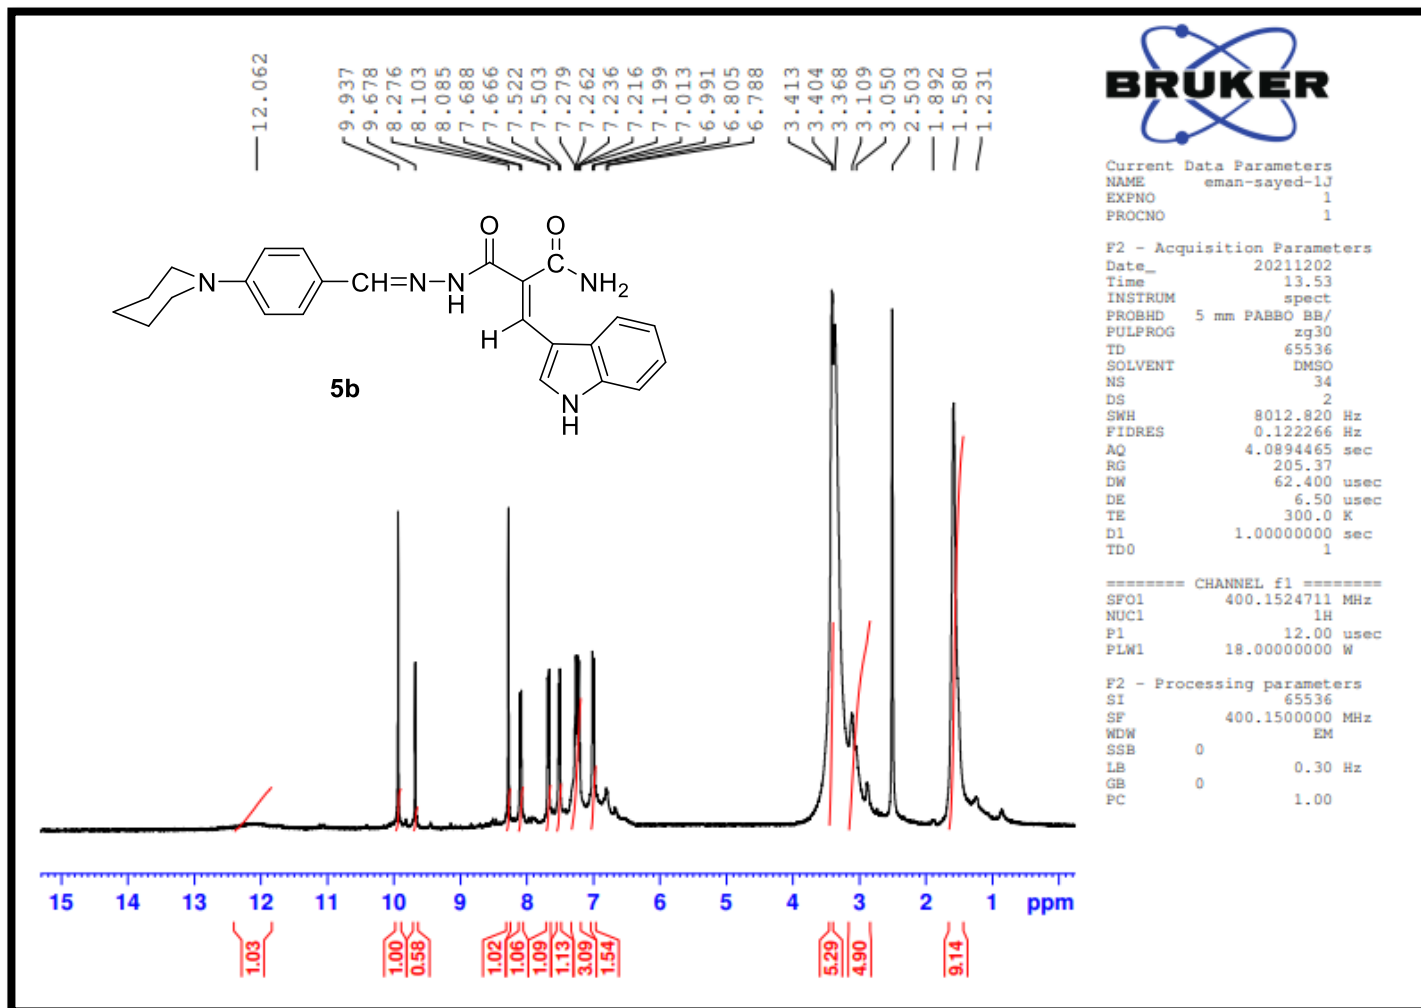

# Spectroscopic data

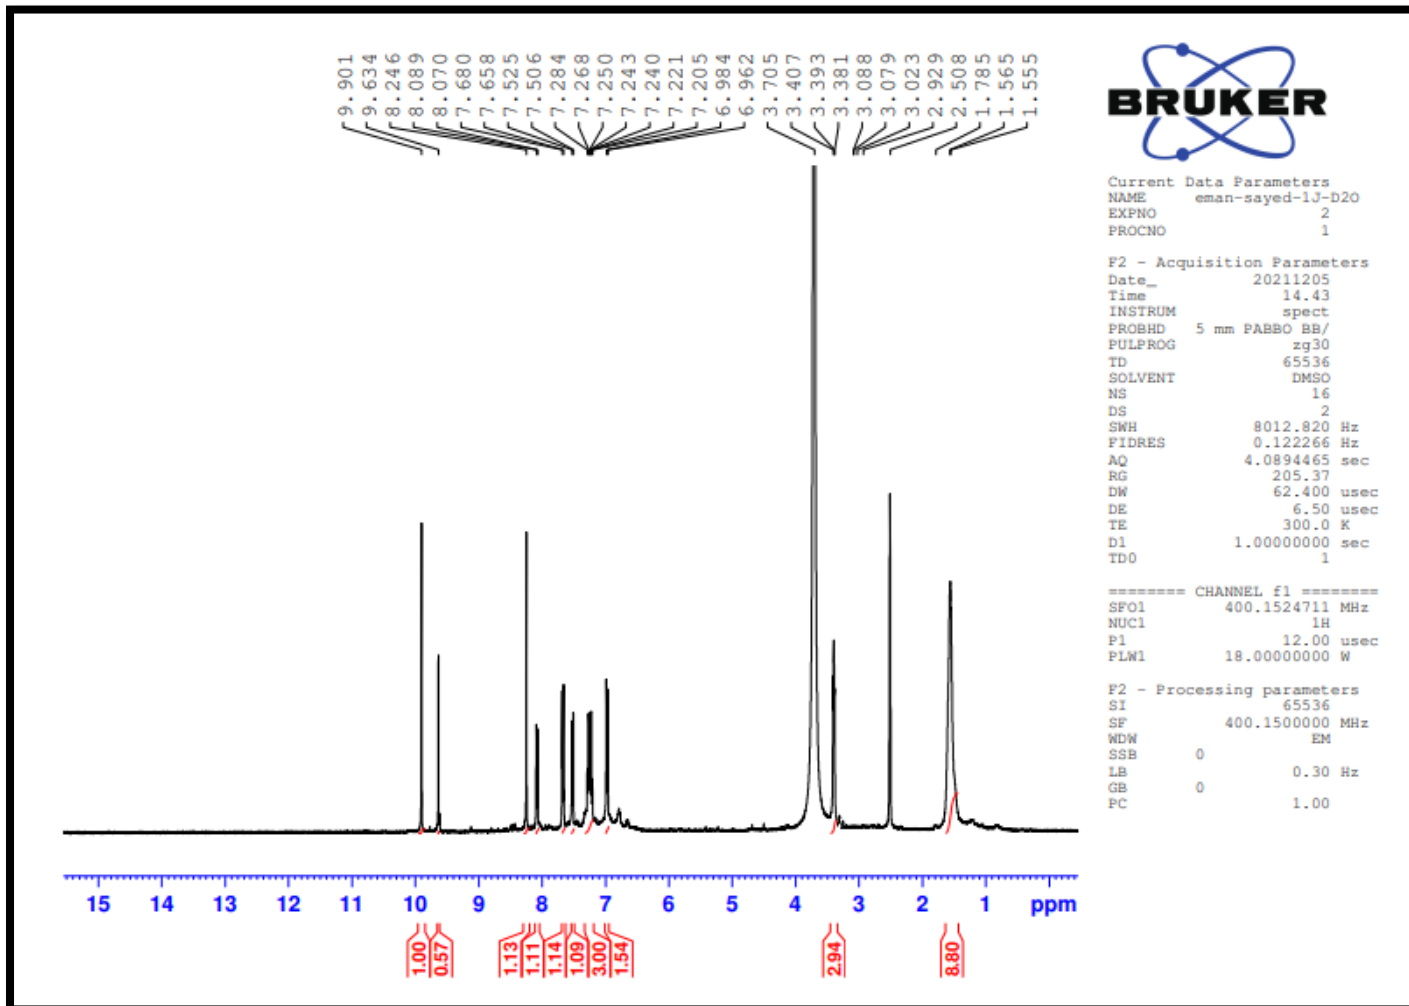

# Spectroscopic data

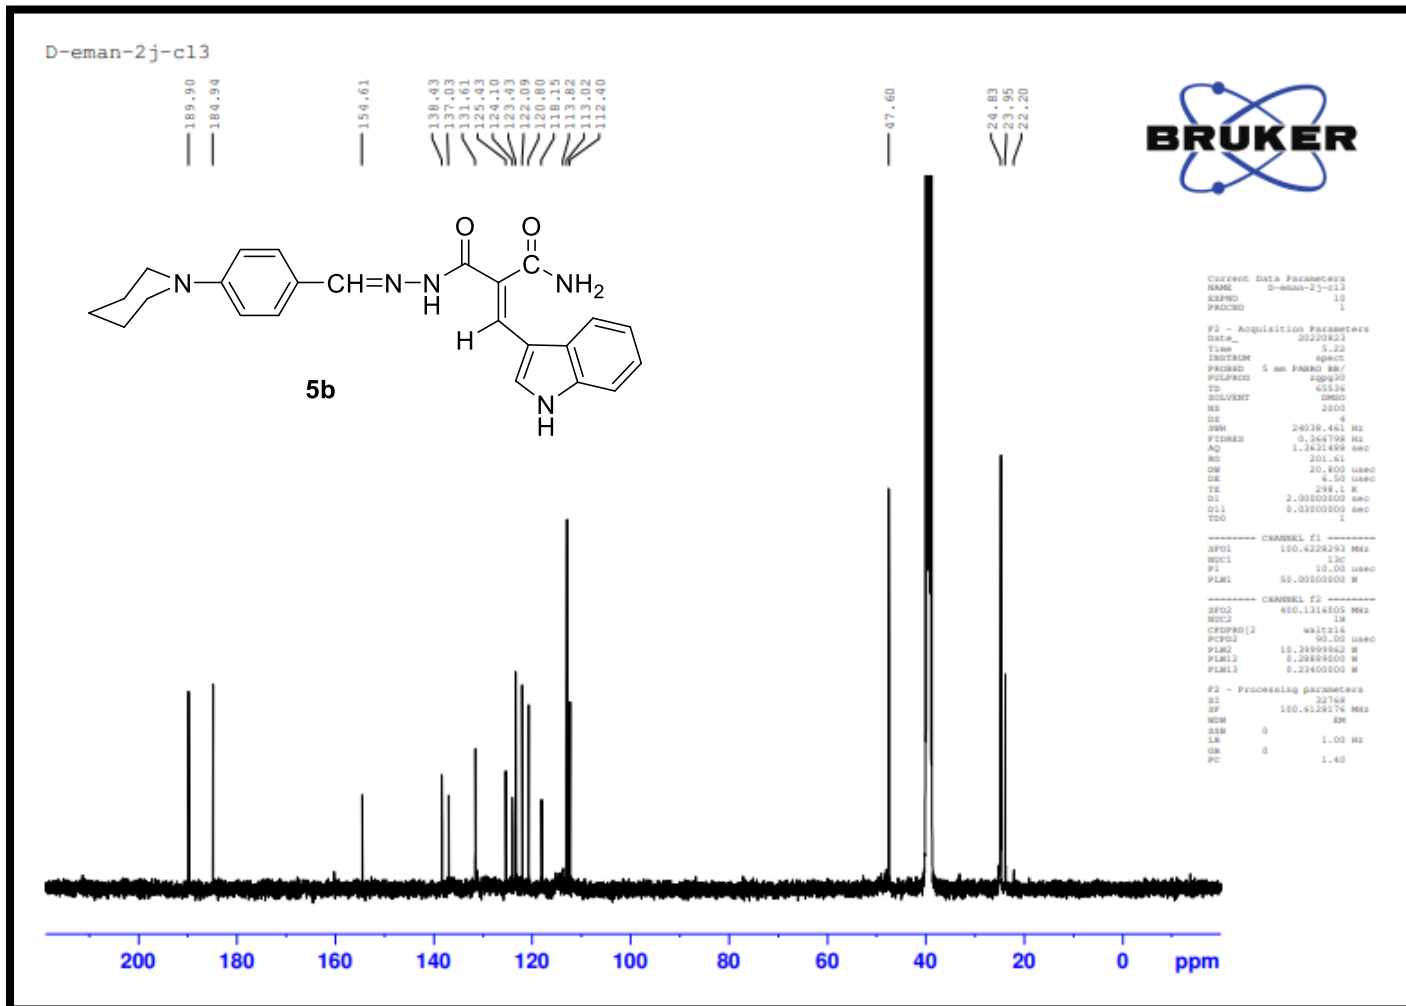

# Spectroscopic data

Eman-Sayed-2J #166-168 RT: 2.79-2.83 AV: 3 SB: 26 1.21-1.34, 0.87-1.14 NL: 2.02E2  
T: + c EI Full ms [40.00-1000.00]

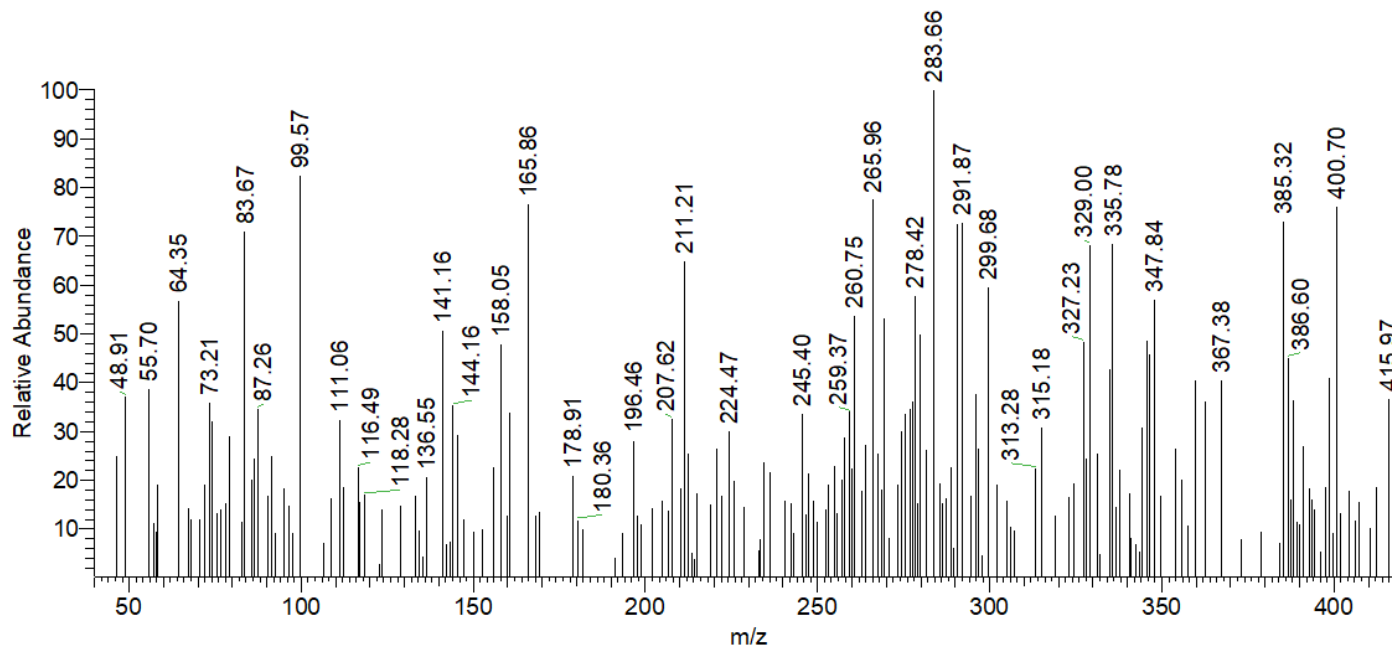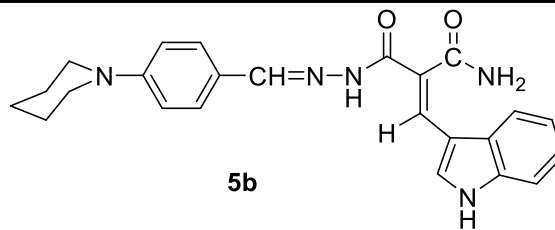

5b

## Spectroscopic data

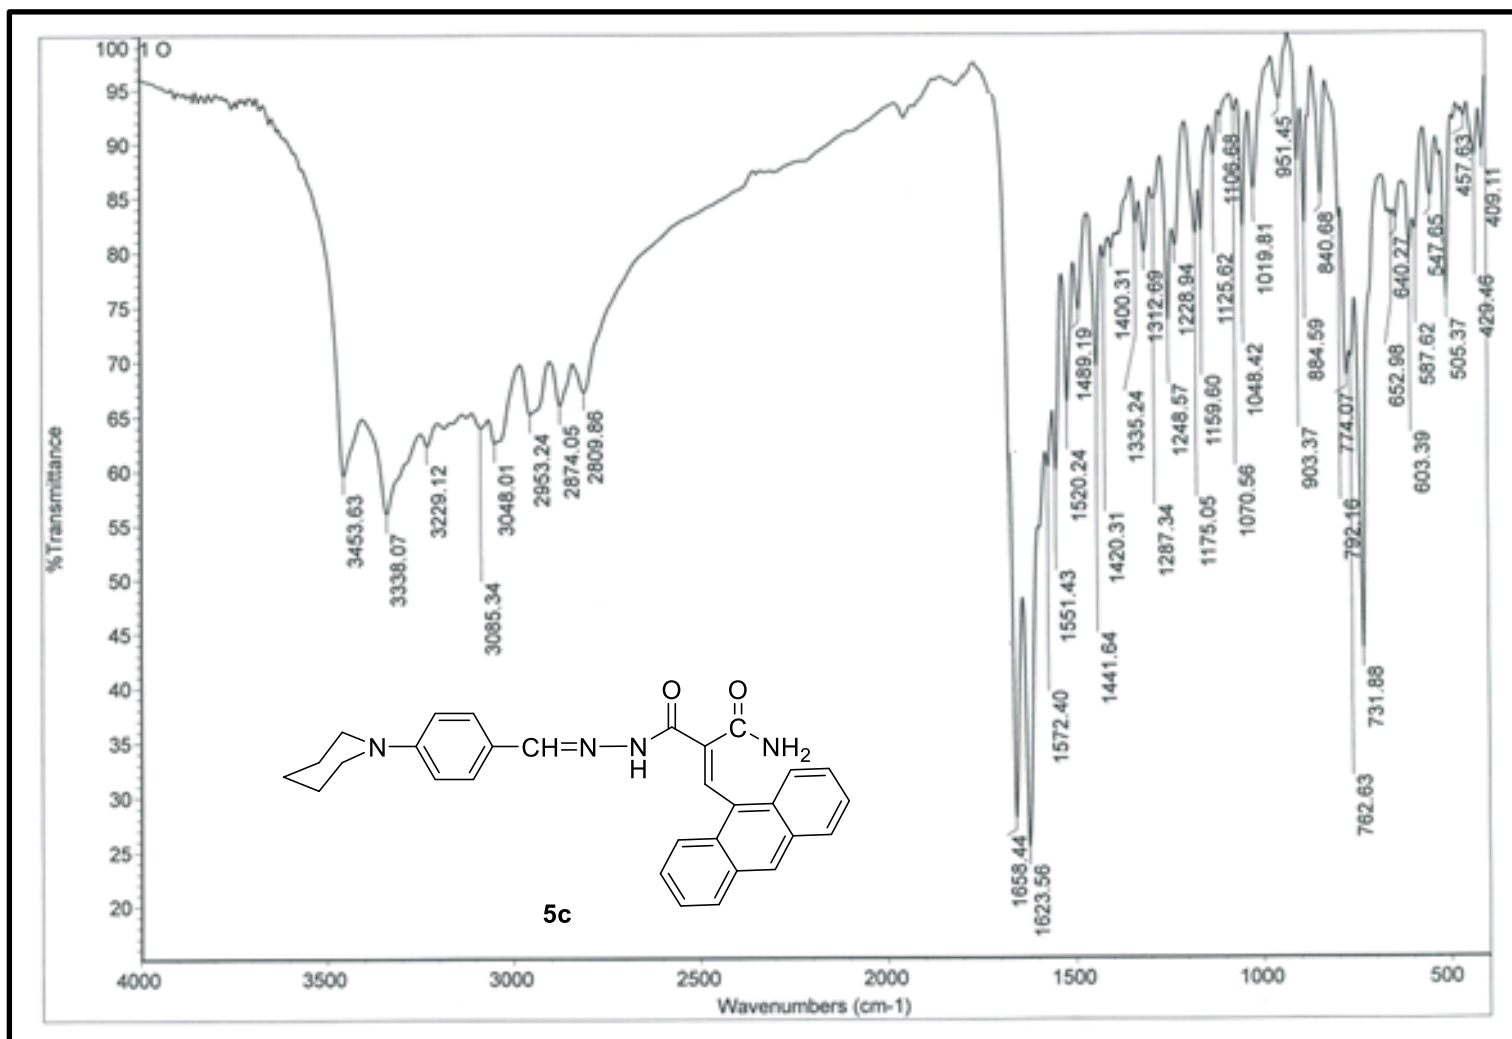

# Spectroscopic data

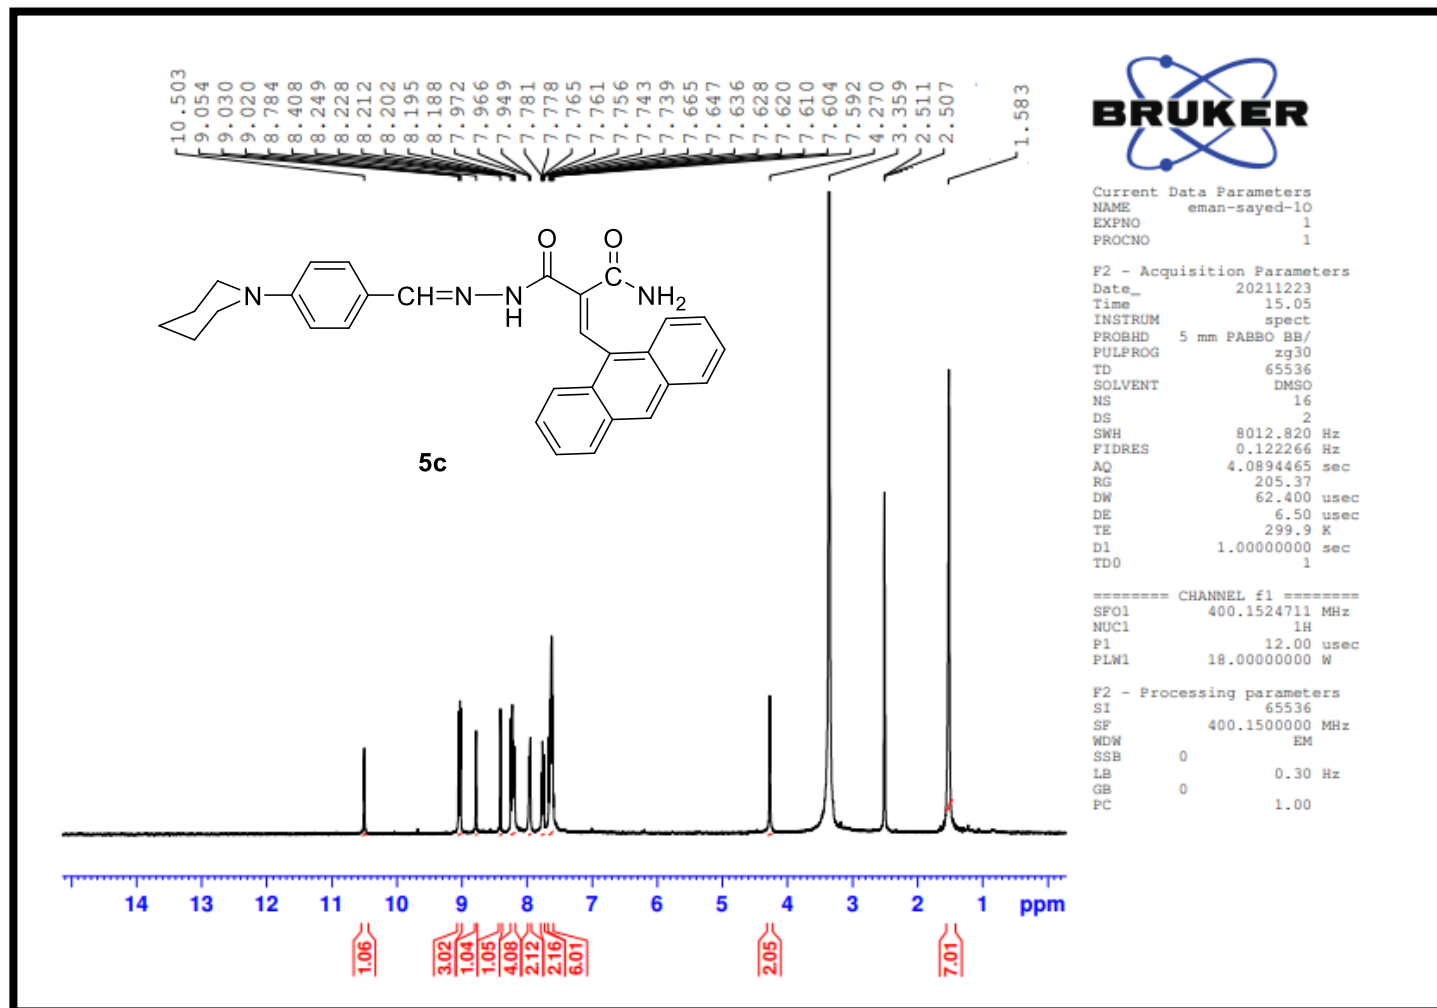

# Spectroscopic data

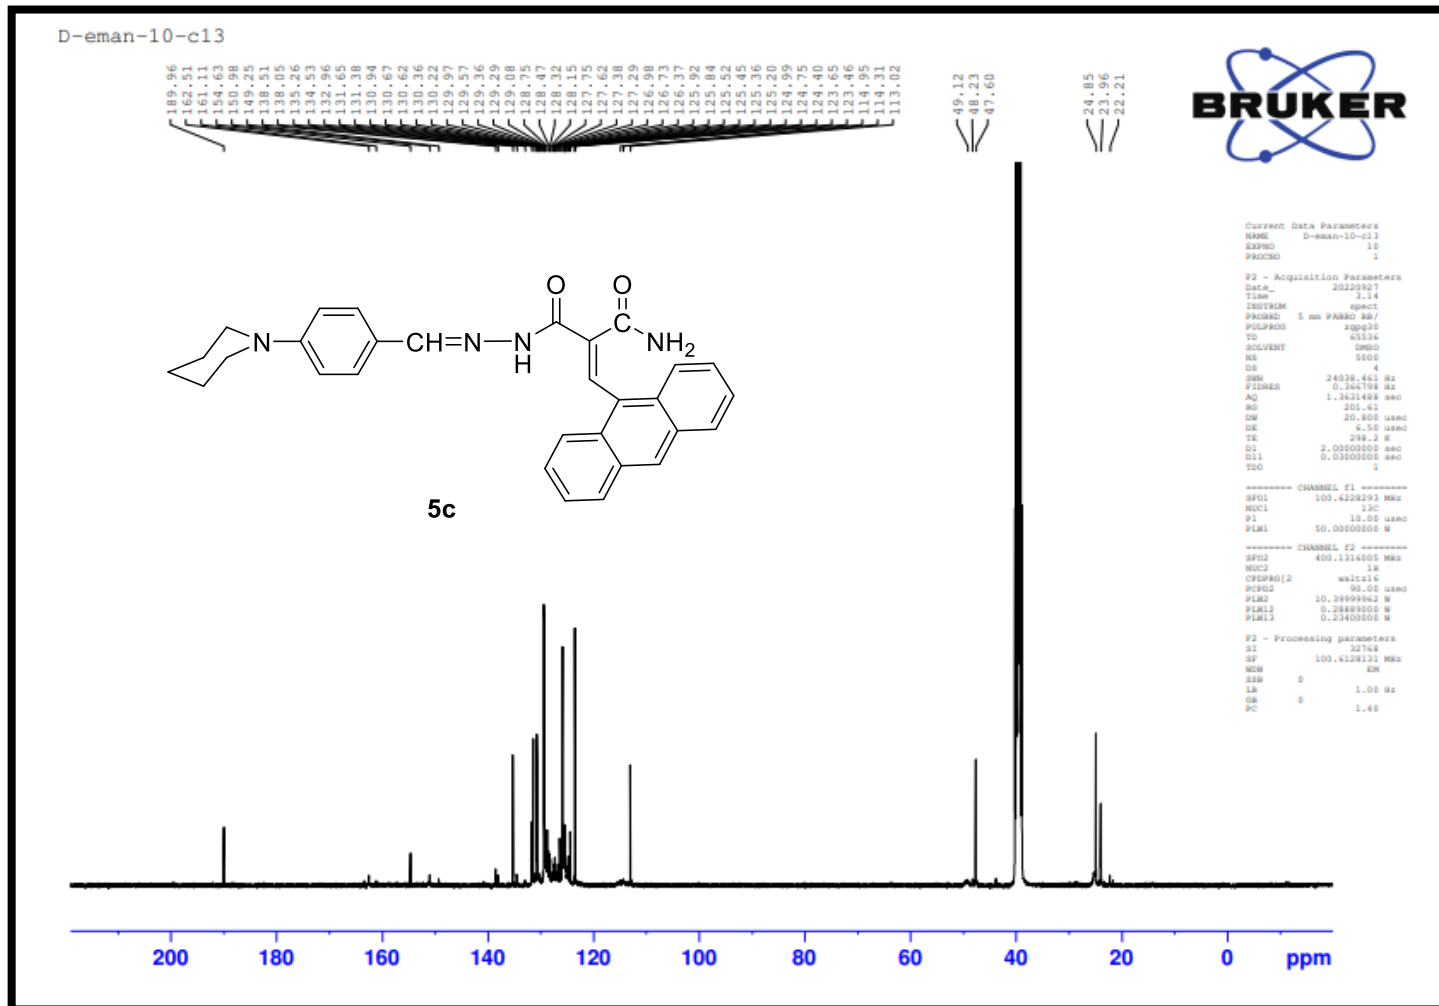

## Spectroscopic data

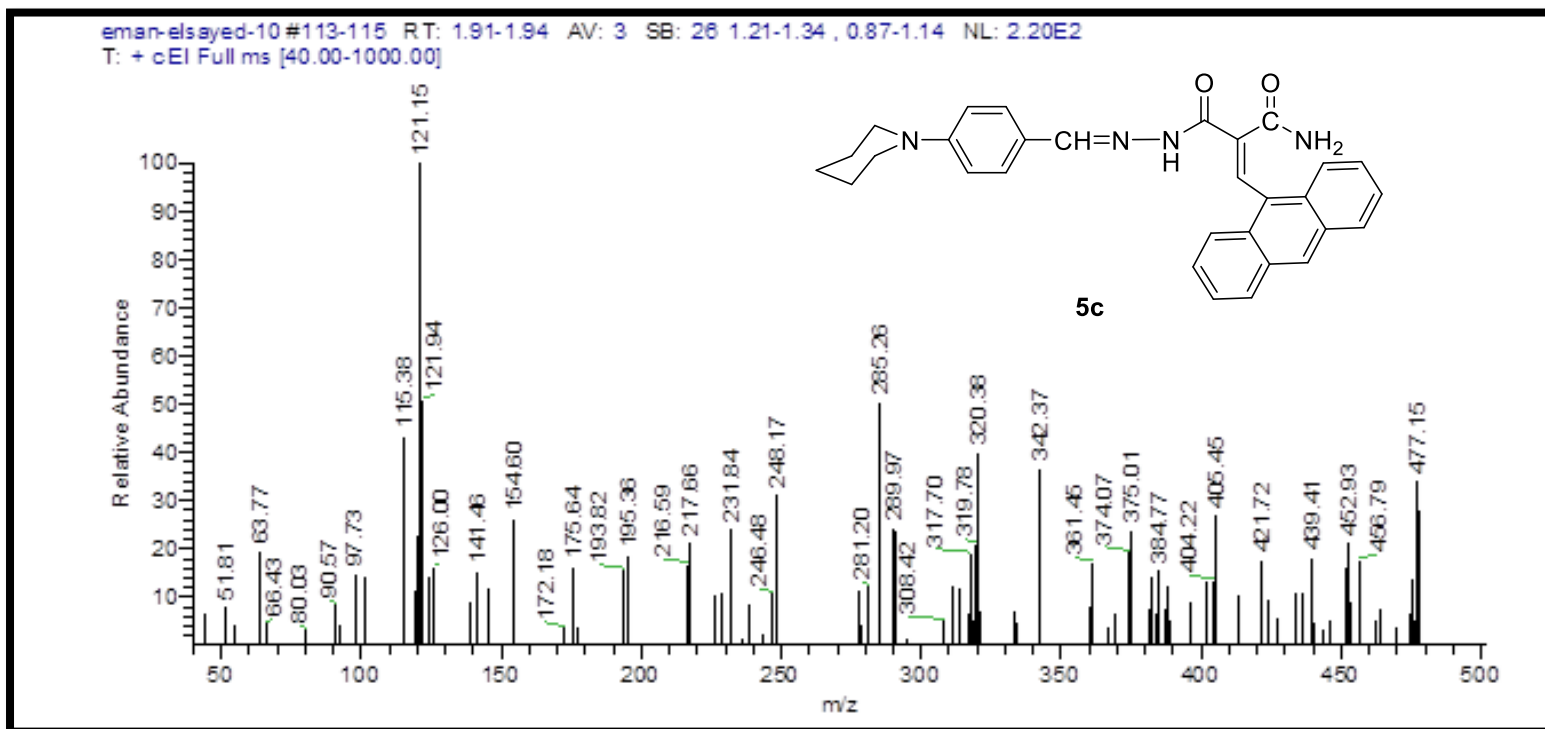



## Spectroscopic data

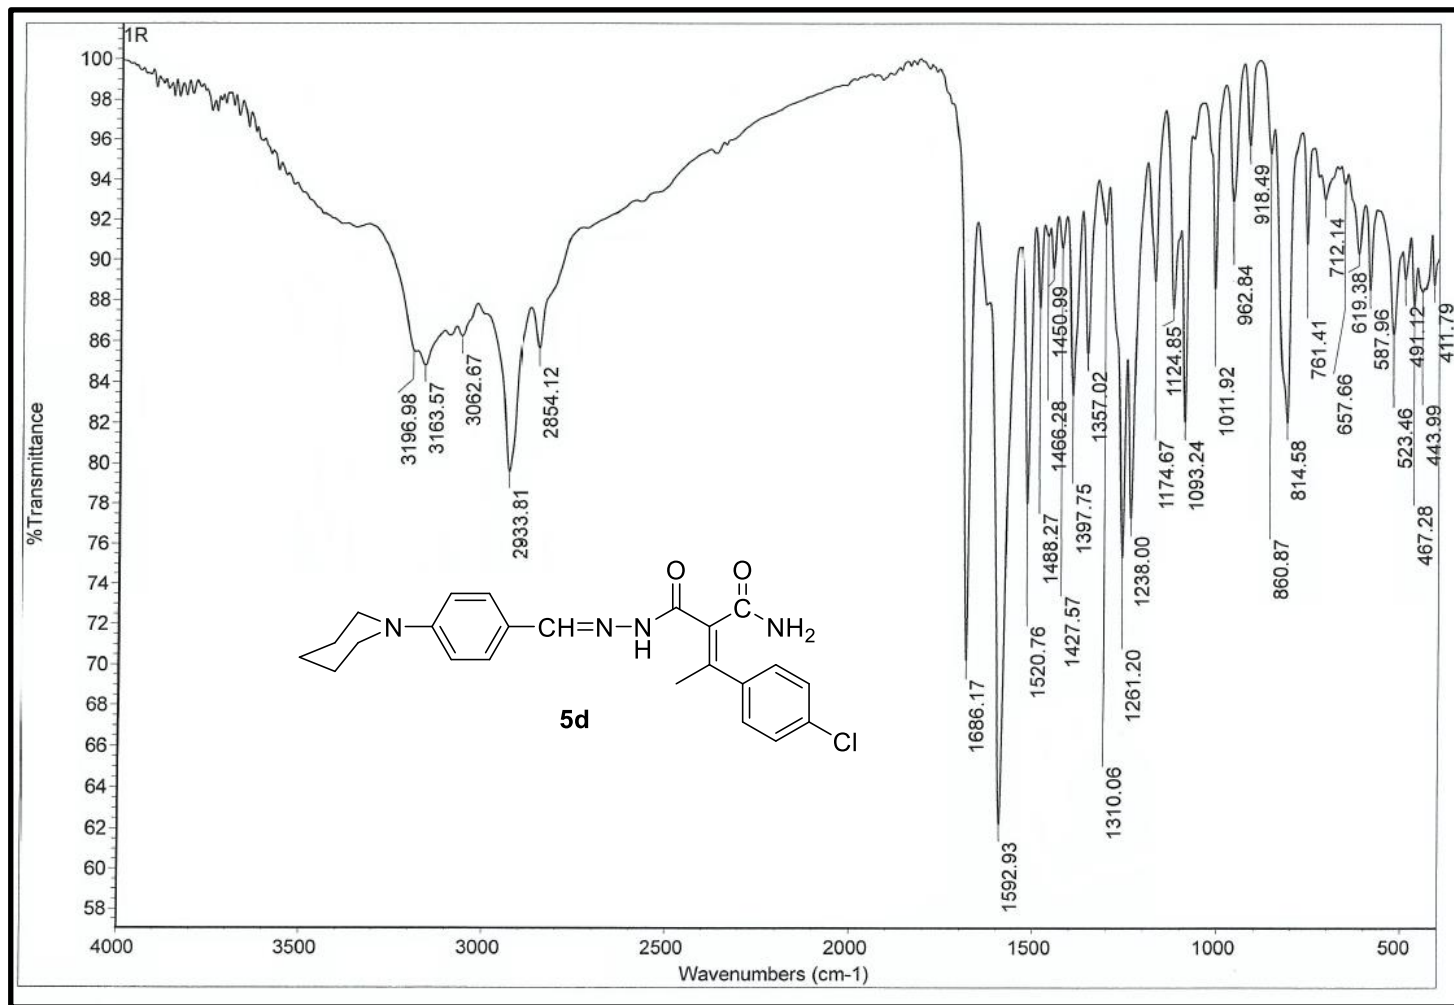

# Spectroscopic data

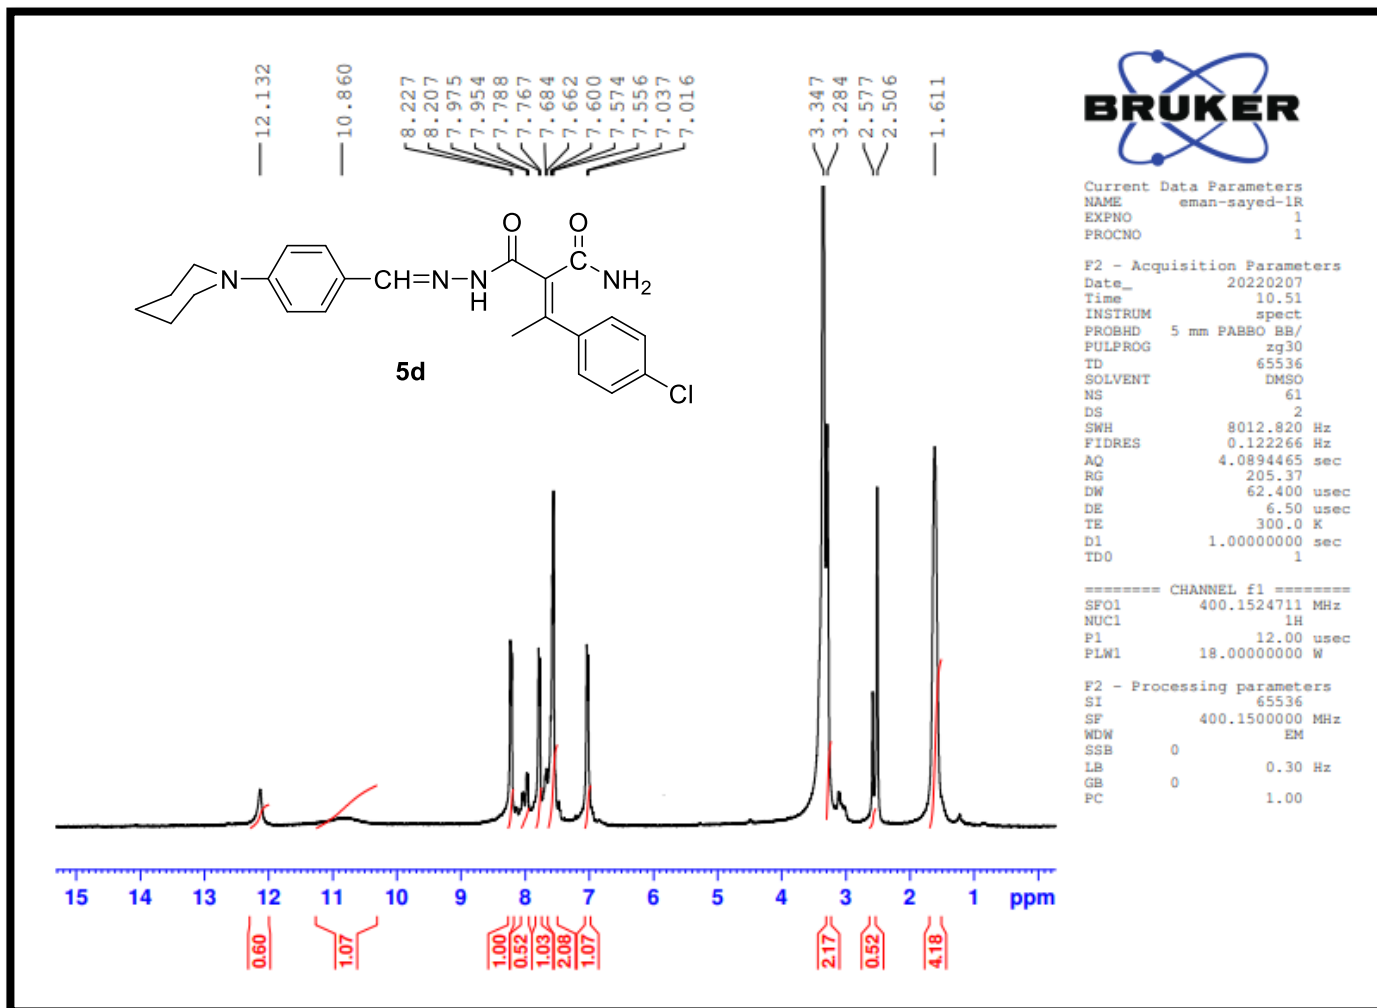

# Spectroscopic data

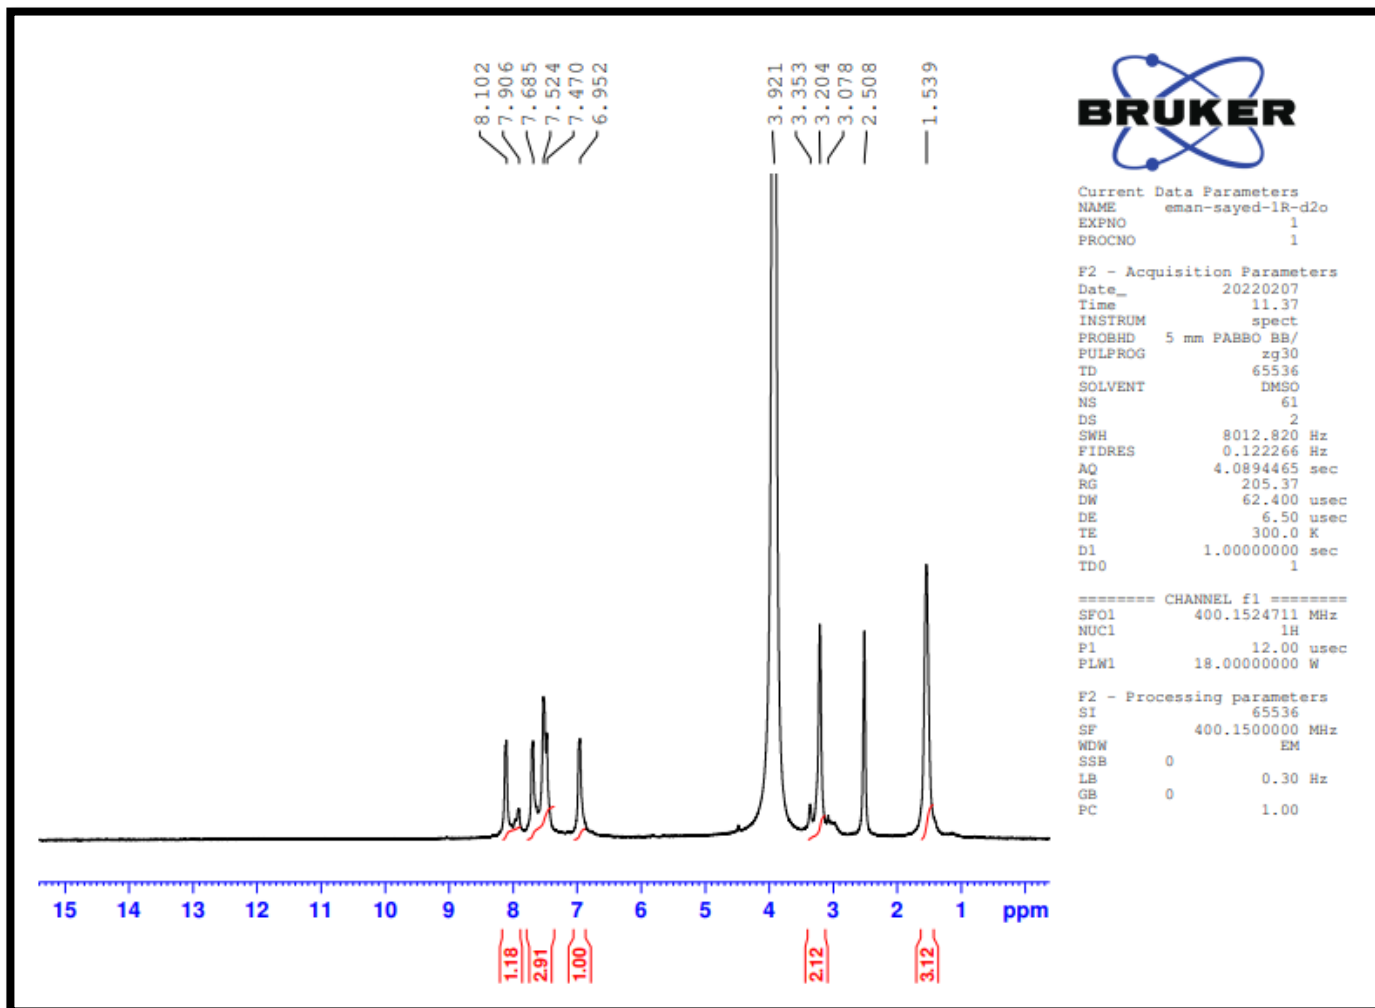

# Spectroscopic data

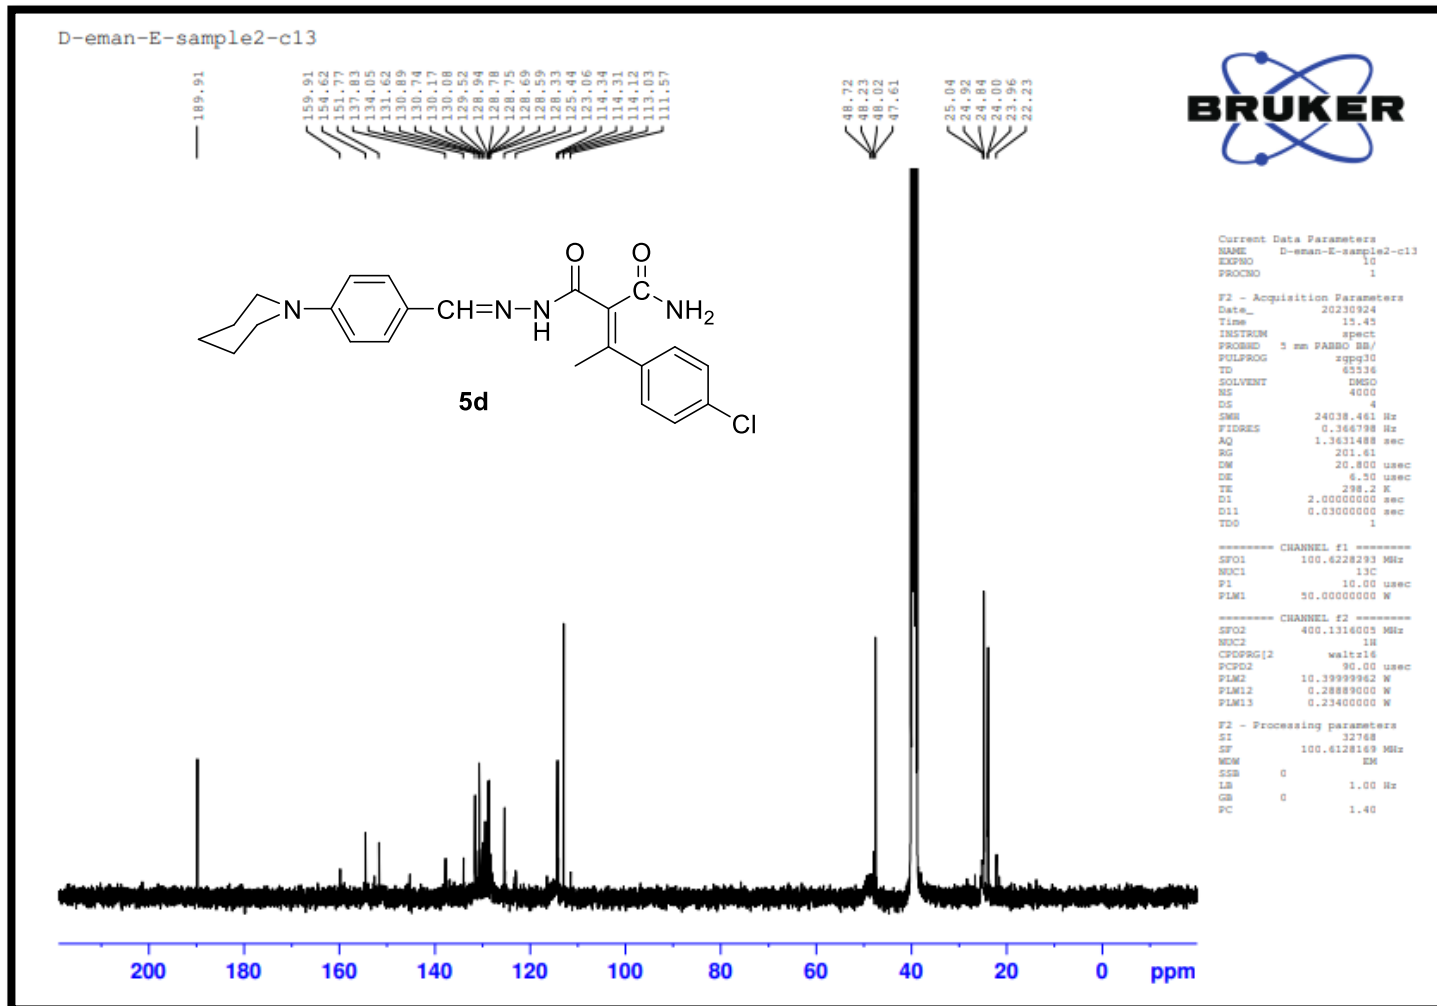

# Spectroscopic data

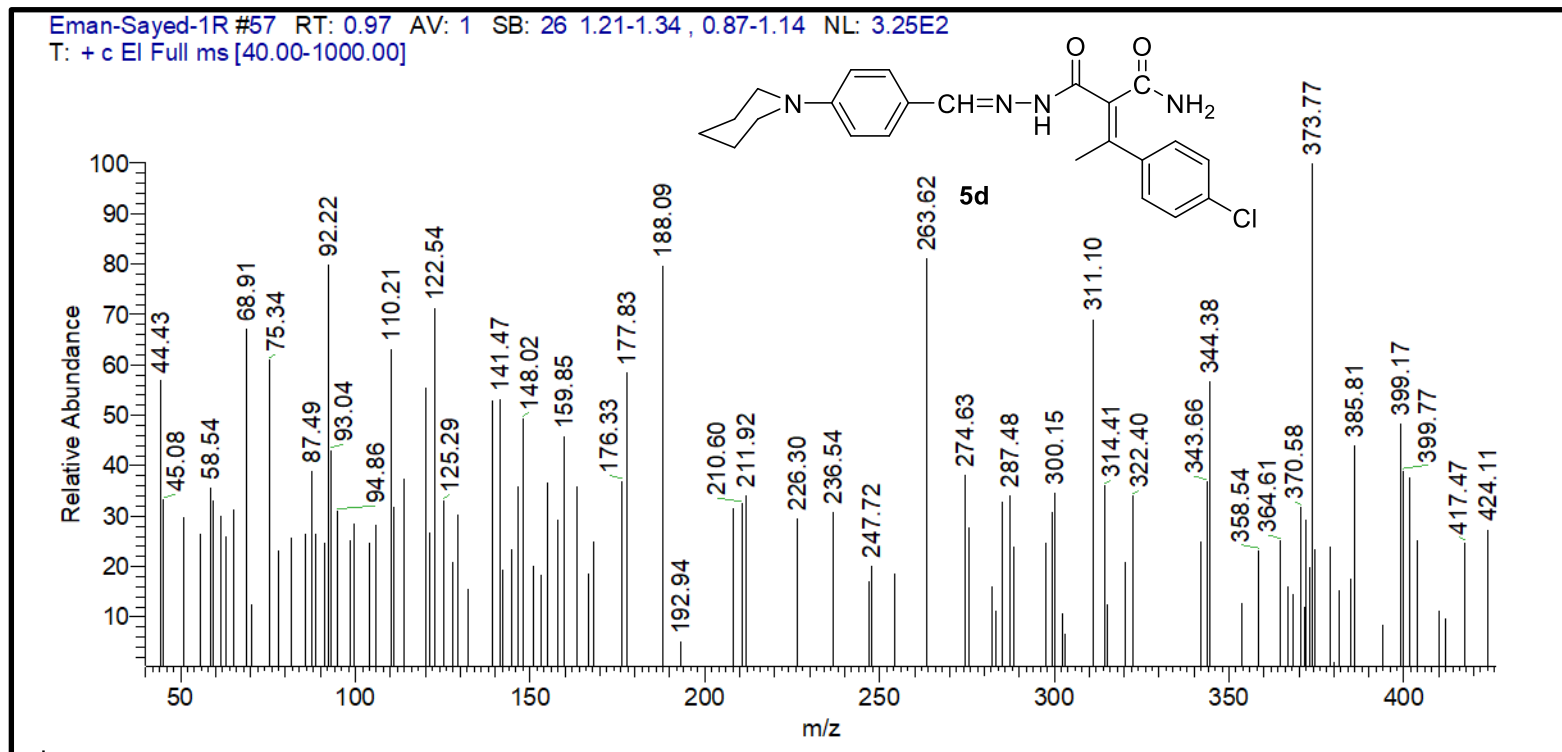

## Spectroscopic data

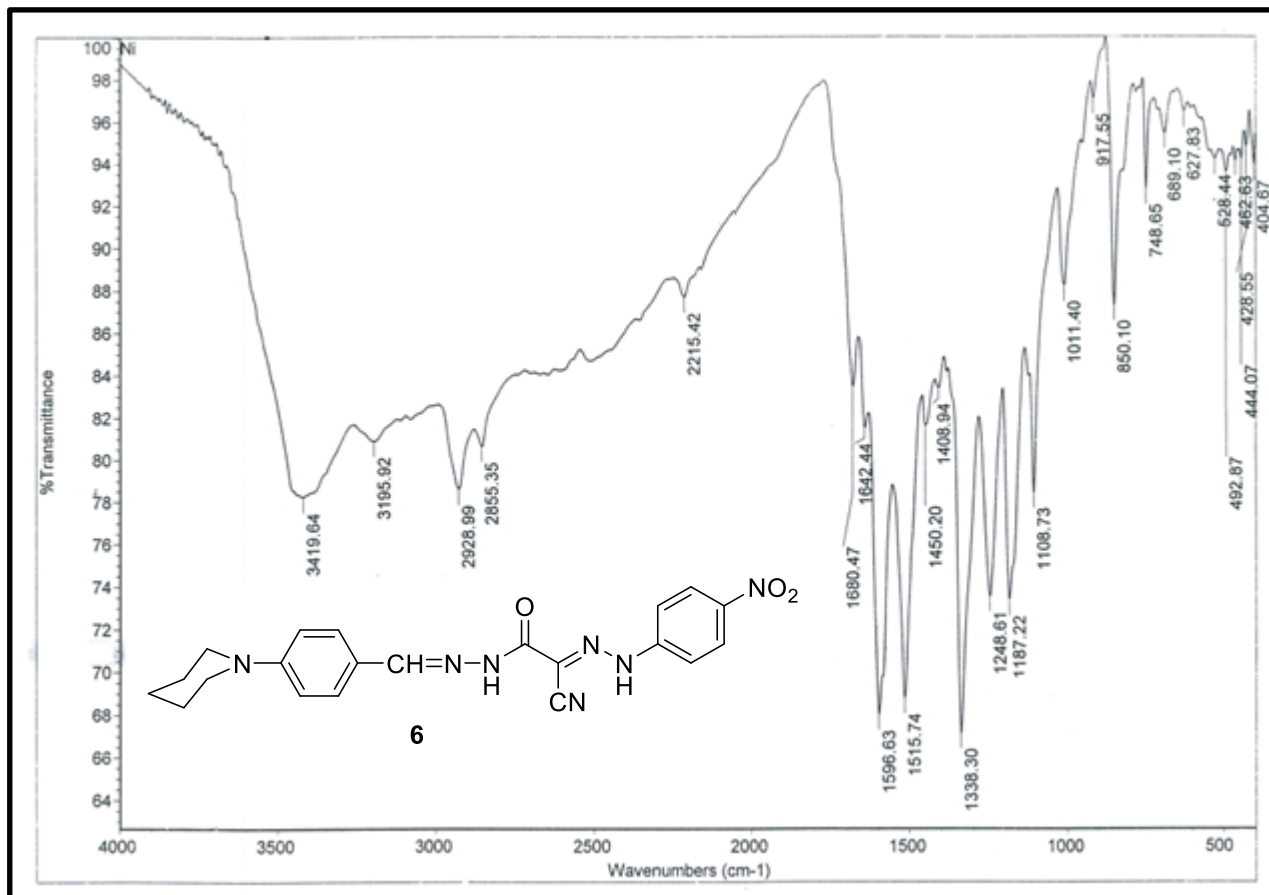

# Spectroscopic data

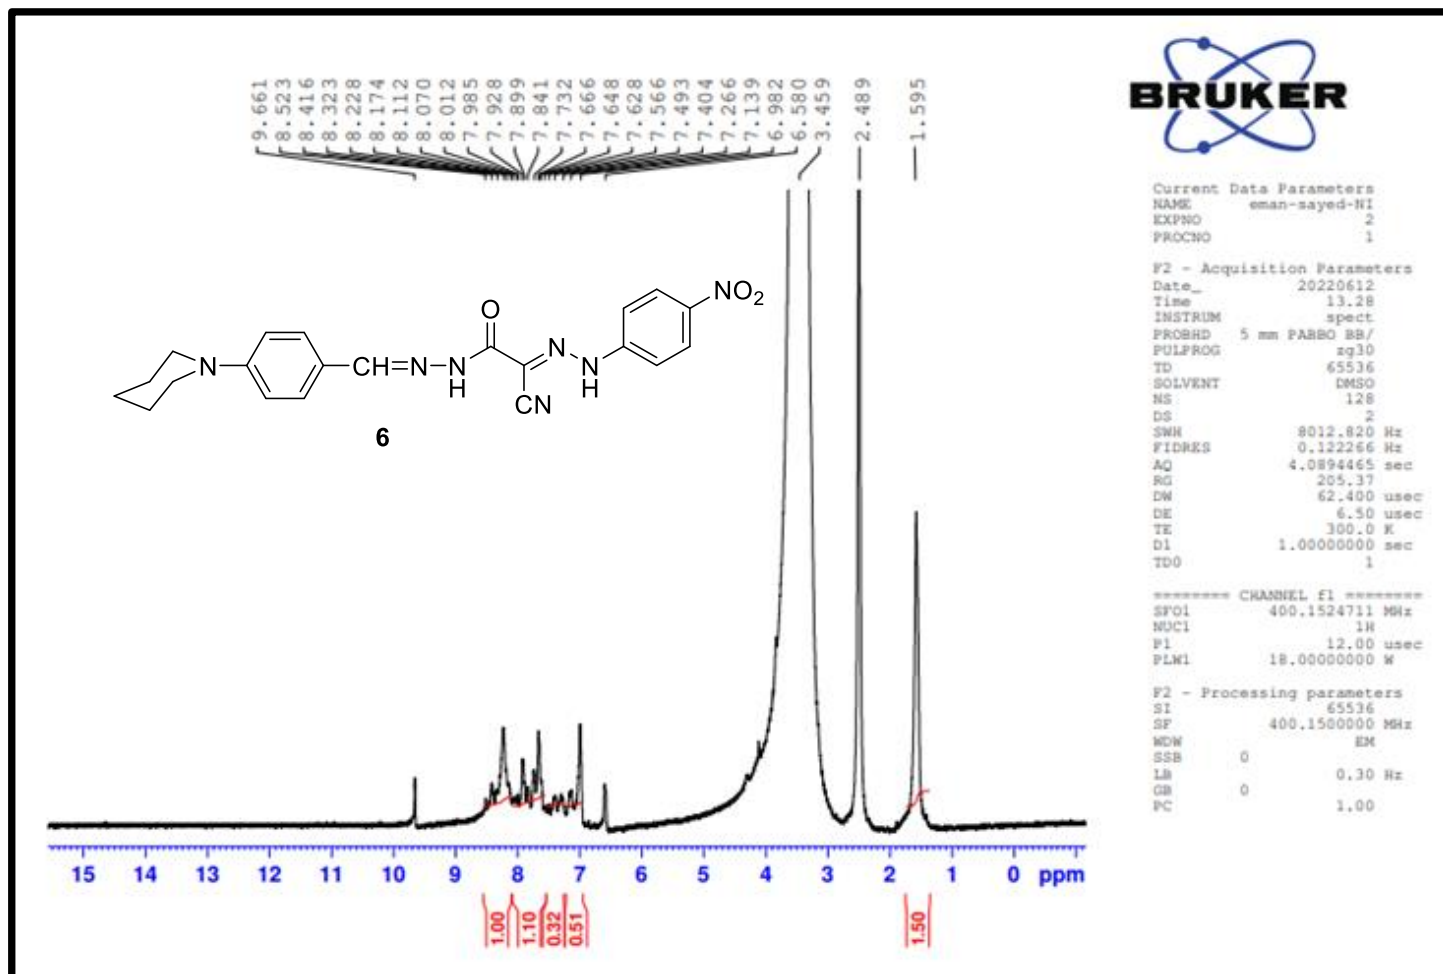

# Spectroscopic data

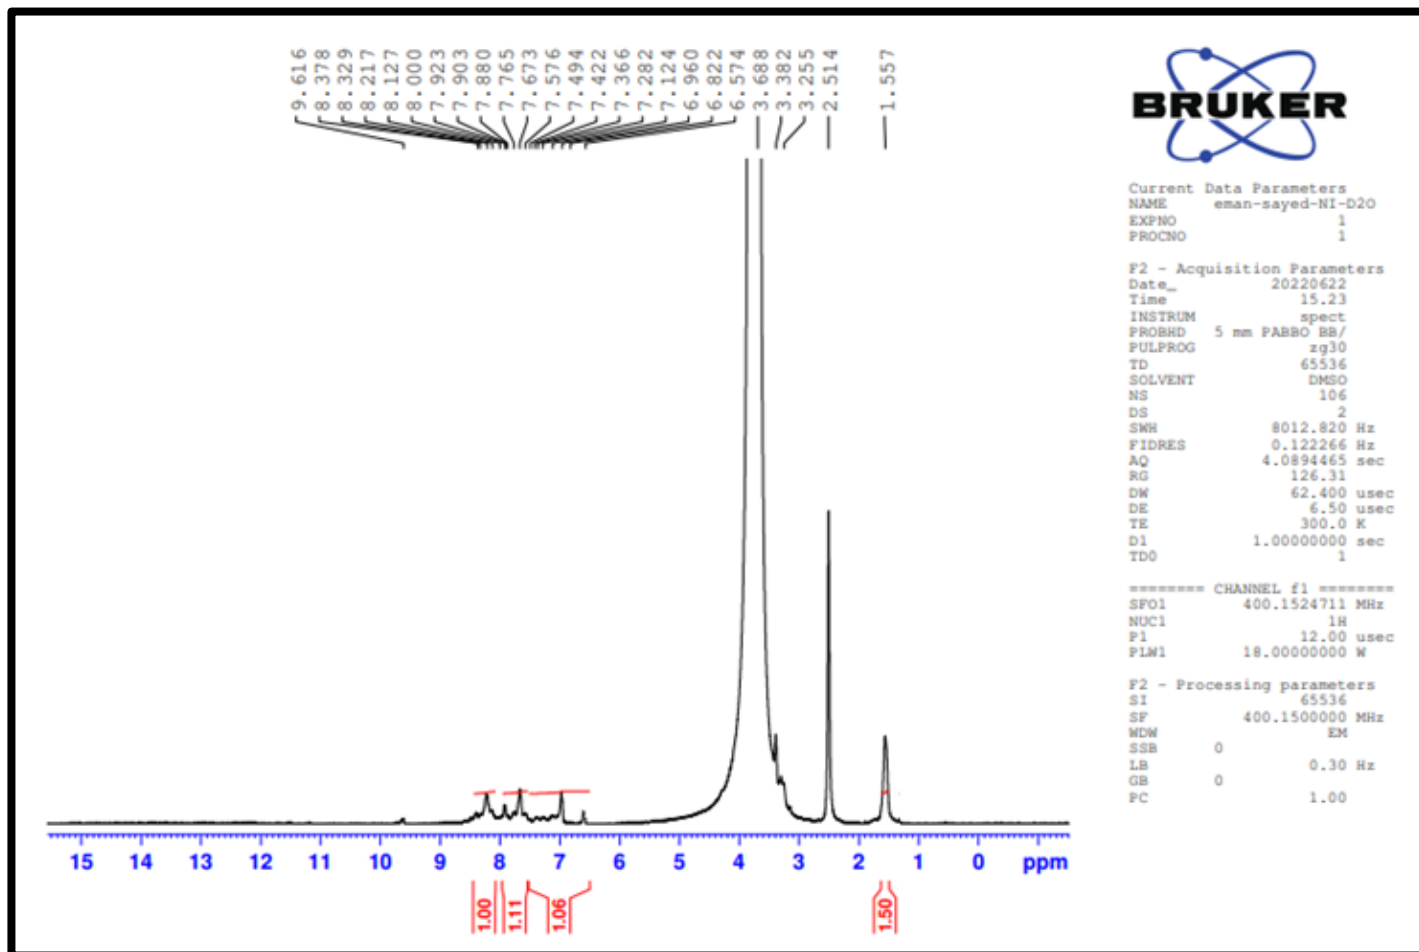



# Spectroscopic data

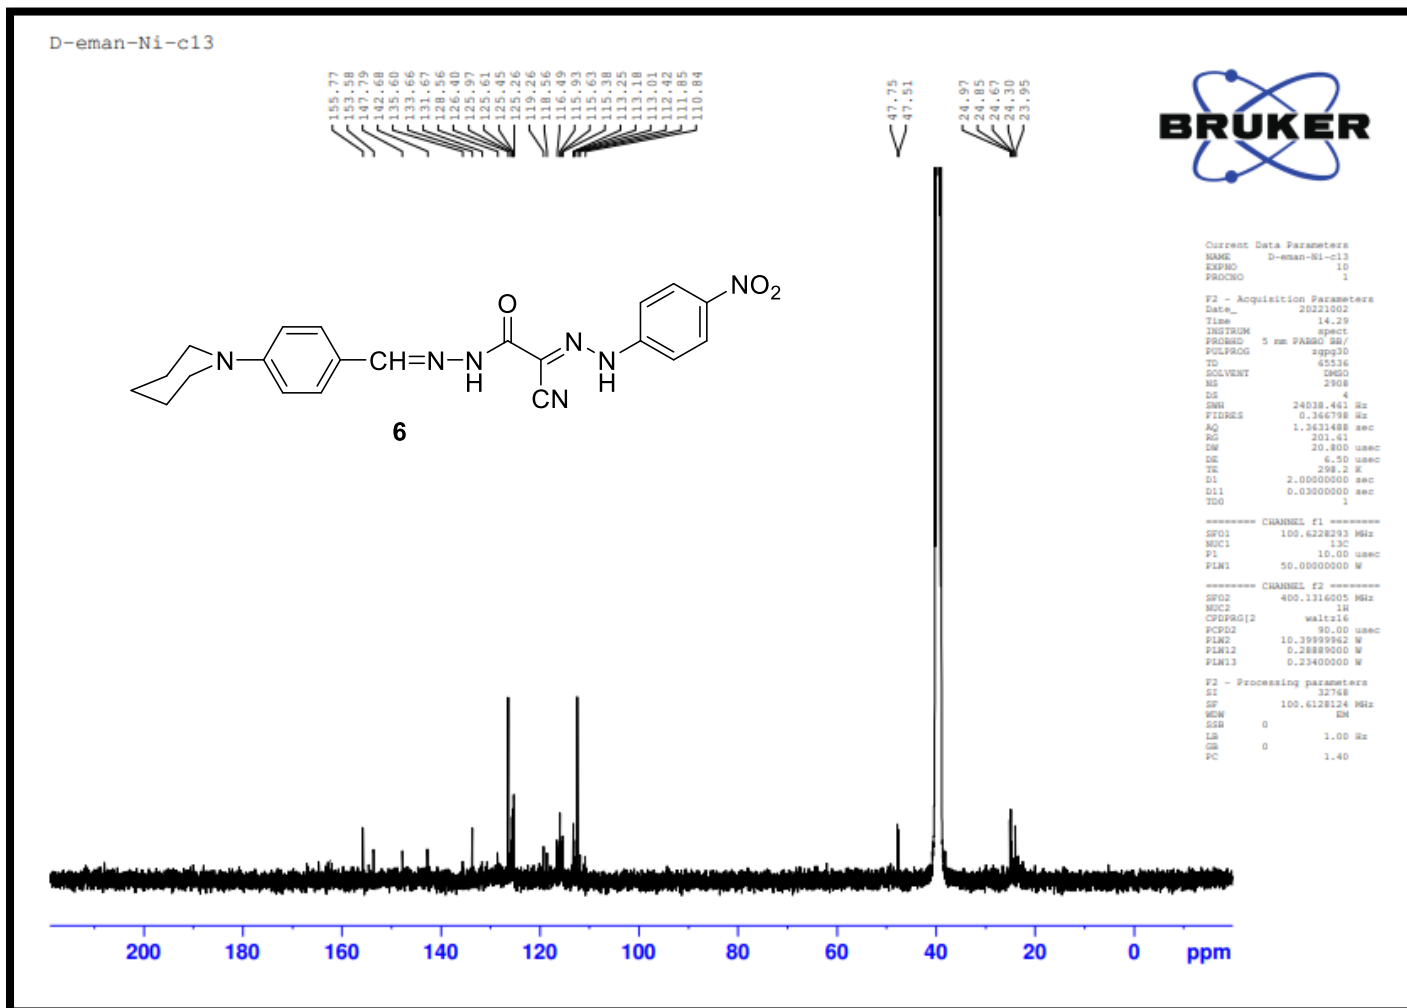

# Spectroscopic data

eman-elsayed-Ni #168-170 RT: 2.83-2.86 AV: 3 SB: 26 1.21-1.34, 0.87-1.14 NL: 1.10E2  
T: + c EI Full ms [40.00-1000.00]

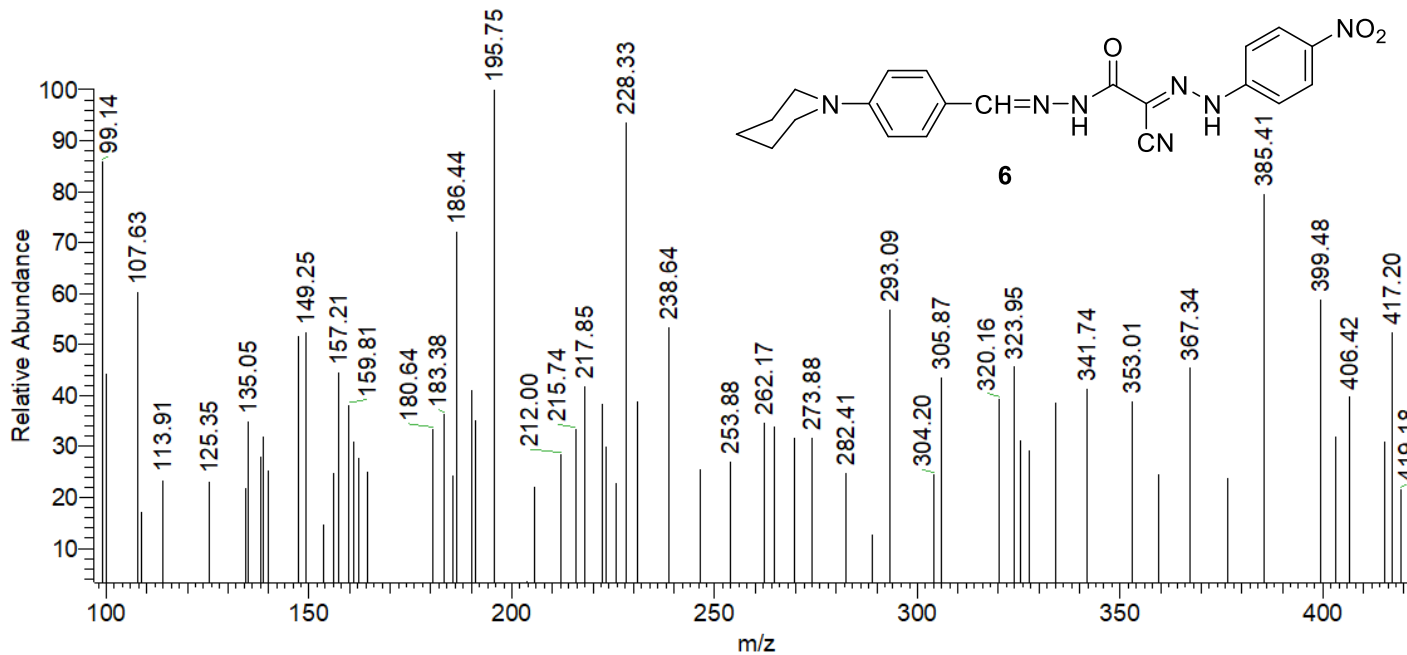

Supplement: d3ra05799b1.pdf [file d3ra05799b1.pdf]
